# 1 **Single-Cell RNA Sequencing of Terminal Ileal Biopsies Identifies** 2 **Signatures of Crohn's Disease Pathogenesis.**

3

4 Monika Krzak<sup>1\*</sup>, Tobi Alegbe<sup>1,2\*</sup>, D Leland Taylor<sup>1,2\*</sup>, Gareth-Rhys Jones<sup>3\*</sup>, Mennatallah  
5 Ghouraba<sup>1</sup>, Michelle Strickland<sup>1</sup>, Bradley T Harris<sup>1</sup>, Reem Satti<sup>1</sup>, Kenneth Arestang<sup>4</sup>, Lucia  
6 Ramirez-Navarro<sup>1</sup>, Nilanga Nishad<sup>4</sup>, Kimberly Ai Xian Cheam<sup>1</sup>, Marcus Tutert<sup>1</sup>, Matiss Ozols<sup>1</sup>,  
7 Guillaume Noell<sup>1</sup>, Steven Leonard<sup>1</sup>, Moritz J Przybilla<sup>1</sup>, Velislava Petrova<sup>1</sup>, Carla P Jones<sup>1</sup>,  
8 Noor Wana<sup>1</sup>, May Xueqi Hu<sup>1</sup>, Jason Skelton<sup>1</sup>, Jasmin Ostermayer<sup>1</sup>, Yong Gu<sup>1</sup>, Wendy Garri<sup>4</sup>,  
9 Biljana Brezina<sup>4</sup>, Charry Queen Caballes<sup>4</sup>, Daniele Corridoni<sup>2,5</sup>, Miles Parkes<sup>4</sup>, Vivek Iyer<sup>1</sup>,  
10 Cristina Cotobal Martin<sup>1</sup>, Rebecca E McIntyre<sup>1</sup>, Tim Raine<sup>4♀</sup>, Carl A Anderson<sup>1,2♀</sup>.

11

12 <sup>1</sup> Wellcome Sanger Institute, Hinxton CB10 1SA, UK

13 <sup>2</sup> Open Targets, Wellcome Genome Campus, Hinxton, CB10 1SA, UK

14 <sup>3</sup> University of Edinburgh Centre for Inflammation Research, Queens Medical Research  
15 institute, Edinburgh EH16 4TJ, UK.

16 <sup>4</sup> Department of Gastroenterology, Addenbrooke's Hospital, Cambridge University Teaching  
17 Hospitals, Cambridge CB2 0QQ, UK

18 <sup>5</sup> Sanofi R&D, The Bennet Building, Babraham Research Campus, Cambridge, CB22 3AT,  
19 United Kingdom.

20

21

22

23 \* These authors contributed equally to this work

24 ♀ These authors jointly supervised the study.

25

26 Correspondence: [carl.anderson@sanger.ac.uk](mailto:carl.anderson@sanger.ac.uk) & [tr223@cam.ac.uk](mailto:tr223@cam.ac.uk)

27

## 28 Summary

29

30 Crohn's disease (CD) is a chronic inflammatory bowel disease exhibiting substantial  
31 heterogeneity in clinical presentation and response to therapy. To explore its molecular basis,  
32 we developed IBDverse, the largest single-cell RNA sequencing (scRNA-seq) dataset of  
33 terminal ileal biopsies, profiling over 1.1 million cells from 111 CD patients and 232 healthy  
34 controls. This resource integrates discovery and replication cohorts for robust identification of  
35 CD-associated cell types, genes, and pathways. We uncovered epithelial changes marked by  
36 interferon-driven MHC-I upregulation, persisting in progenitors after macroscopic inflammation  
37 resolution. *ITGA4*<sup>+</sup> macrophages were identified as key inflammatory drivers, showing  
38 enriched JAK/STAT signaling and cytokine expression (IL-6, IL-12, IL-23). Heritability analysis  
39 linked inflammatory monocytes and macrophages to CD susceptibility, implicating resident  
40 and recruited immune cells in pathogenesis. These findings establish a comprehensive  
41 cellular and molecular framework for CD, offering new insights into disease mechanisms and  
42 therapeutic opportunities.

43

## 44 Keywords

45 Inflammatory bowel disease; IBD; single-cell RNA sequencing; Crohn's disease; differential  
46 gene expression; heritability enrichment; MHC class I; antigen-presentation

47

## 48 Introduction

49 Crohn's disease (CD) is a debilitating inflammatory bowel disease (IBD) characterised by  
50 chronic relapsing and remitting inflammation of the gastrointestinal tract. The biological basis  
51 of CD is incompletely understood, although it is hypothesised to be caused by an overactive  
52 immune response to commensal gut bacteria in genetically predisposed individuals. Although  
53 inflammation is most commonly observed in the terminal ileum, CD exhibits significant  
54 heterogeneity in disease location, severity, and behaviour, both between patients and within  
55 patients over time. While therapies targeting cytokines such as TNF, IL-12 and IL-23 have  
56 improved clinical outcomes for some patients, primary non-response and secondary loss of  
57 response to treatment remains high, with 15% of CD patients requiring surgical intervention  
58 within five years of diagnosis [1], [2]. Consequently, there is an urgent need to understand  
59 better the aetiology of CD in order to broaden therapeutic opportunities.

60  
61 Genetic association studies have identified over 320 loci associated with IBD susceptibility [3],  
62 [4], [5]. Together, these associations have suggested that a broad range of immune, epithelial  
63 and stromal cell genes and pathways are involved in CD pathogenesis. However, it is often  
64 challenging to draw novel biological insights from these discoveries because most of these  
65 disease-associated variants reside in the non-coding genome and it is unclear which genes  
66 and pathways they dysregulate. While functional genomic studies of disease-relevant tissues  
67 and cell types have shown utility for identifying CD effector genes, pathways and cell types  
68 [6], [7], [8], [9], [10], [3], progress has been hampered by their restriction to whole tissues or a  
69 limited number of cell types and states.

70  
71 Single-cell RNA sequencing (scRNA-seq) technologies overcome this limitation by providing  
72 a high-throughput means to dissect complex tissues at the resolution of single cells and cell  
73 types. ScRNA-seq atlases of the gastrointestinal tract have already made some important  
74 discoveries, including the pathogenic remodelling of mesenchymal cells [11] and  $CD8^+$  T cells  
75 [12] in ulcerative colitis (UC), another common form of IBD, as well as the identification of  
76  $BEST4^+$  enterocytes that are crucial in maintaining luminal pH in both UC and CD [13], [14],  
77 [15], and identification of metaplastic cells in IBD [16]. Falling scRNAseq costs have begun to  
78 enable cell-type resolution comparisons of gene-expression between groups of samples, for  
79 example between different gut locations [17], between disease cases and unaffected controls  
80 [14], [17] or between responders and non-responders to a drug [18]. While these early  
81 discoveries showcase the potential for scRNA-seq-based differential gene-expression studies  
82 to deliver biological insights into disease, power to detect differentially expressed genes has  
83 been constrained by the small sample sizes used to date. Furthermore, the clinical and

84 biological heterogeneity of IBD, along with the technical noise inherent in scRNA-seq data  
85 [19], increases the risk of false-positive associations due to confounding and further limits  
86 power to detect true associations. A large scRNA-seq study of gastrointestinal samples  
87 ascertained from hundreds of CD patients and healthy controls would thus be a key resource  
88 to identify genes, pathways and cell types that are reproducibly associated with CD and related  
89 phenotypes.

90  
91 To address this need, we present IBDverse, a scRNA-seq data resource of over 1,185,000  
92 cells isolated from terminal ileum biopsies from 111 patients with Crohn's disease and a history  
93 of current or previous terminal ileitis and 232 healthy controls. This study, which comprises  
94 both a discovery and replication cohort, is uniquely powered to identify gastrointestinal cell  
95 types, genes and pathways reproducibly associated with CD. Using these data we identify and  
96 replicate genes that are aberrantly expressed in CD, plus those where expression is specific  
97 to given cell types and cellular processes. We then identify which of these cell types and  
98 processes are likely to play a causal role in disease by quantifying their enrichment within IBD  
99 genetic association signals. The terminal ileal cell transcriptional data and associated  
100 phenotypic information from the IBDverse are available at zenodo DOI:  
101 <https://zenodo.org/records/14276773> (Data availability) and the expression atlas of  
102 gastrointestinal cell types is accessible at <https://www.ibdverse.info/>.

103

## 104 Results

### 105 **Large scale single-cell sequencing of terminal ileal biopsies identifies 57 cell clusters** 106 **comprising epithelial, immune and mesenchymal cell types.**

107 Terminal ileal (TI) biopsies were collected from 343 patients during ileo-colonoscopy,  
108 comprising 232 biopsies from healthy controls and 111 biopsies from CD patients with either  
109 active inflammation in the TI or a documented history thereof (Fig. 1a). Baseline demographics  
110 of sex and smoking status were not associated with disease status ( $p > 0.001$ , Fisher's exact  
111 test). CD patients were significantly younger than the healthy controls by an average of 8 years  
112 ( $41 \pm 12$  vs  $49 \pm 13$  years,  $p < 0.001$ , t-test) (Table 1). The magnitude of TI inflammation was  
113 assessed using inflammatory components of the simplified endoscopic score of CD activity  
114 (SES-CD) to measure ulceration and mucosal surface involvement. The CD biopsies were  
115 subsequently classified according to endoscopic severity of disease using a score based upon  
116 three inflammatory components (inflamed surface, ulcer size, ulcerated surface) of the  
117 validated "simple endoscopic score for CD" (SES-CD), applied to the terminal ileal segment

118 by a single central reader (TI-SES-CD score). This resulted in 64 inflamed (TI-SES-CD $\geq$ 3) and  
119 47 uninfamed (TI-SES-CD $<$ 3) biopsies from 111 individuals (biopsies are unpaired). Clinical  
120 information and metadata for the participants are provided in Table S1.

121

122 All 343 ileal biopsies were processed using a tissue dissociation protocol performed on ice  
123 [20] to improve epithelial cell isolation by enhancing cell viability and minimizing cellular stress  
124 compared to conventional collagenase digestion at 37°C [21]. A representative cell atlasing  
125 cohort consisting of 216,376 high-quality cells (Methods) was derived from 70 randomly  
126 selected samples (35 CD {uninfamed/inflamed} and 35 controls), with an average of ~4,100  
127 post-QC cells from CD biopsies and ~2,000 post-QC cells from healthy biopsies (Fig. 1b).  
128 Marker genes for each of the 57 unique cell clusters were identified using Wilcoxon rank-sum  
129 tests, and manual annotations were performed by integrating literature references and  
130 lineage-defining gene expression profiles (Fig. S1; Table S2; Methods). These 57 clusters  
131 defined three major compartments, comprising eight major cell populations: epithelial cells  
132 (enterocytes, secretory, and stem cells), immune cells (T, B, plasma B cells, and myeloid  
133 cells), and mesenchymal cells. Positional marker genes from a spatial transcriptomic study of  
134 mouse jejunum [22] were employed to annotate enterocytes and secretory cells along the  
135 crypt (precursor/progenitor) and villus (bottom/middle/top) axis (Fig. S2). Gene expression  
136 signatures of all 57 cell types were then used to build a cell type classifier to annotate cells  
137 from the remaining 273 samples not included in the atlasing cohort.

138

139 As expected, the cellular composition was altered in CD, with overrepresentation of cell types  
140 known to accumulate in intestinal inflammation. For example, *S100A8/9*<sup>+</sup> monocytes and  
141 *CXCL9/CXCL10*<sup>+</sup> macrophages were effectively absent (<2%) in health (Fig. S3). In disease,  
142 these cell-types comprised 25% and 7%, respectively, of all cells in the myeloid compartment,  
143 in keeping with their known role in pathogen/inflammatory response [18], [23], [24], [25].  
144 Similarly, four clusters of enterocytes (*GPX2*<sup>+</sup> progenitor crypt, *KRT20*<sup>+</sup> precursor crypt, *IFI27*<sup>++</sup>  
145 mid villus and *IFI27*<sup>++</sup> bottom villus) were all almost exclusively found in CD (Fig. S3), and  
146 displayed transcriptional changes associated with barrier-response to injury. For example,  
147 both the “*IFI27*<sup>++</sup> bottom and middle villus” clusters were denoted by high expression of  
148 *CEACAM20*, a sensor of gram negative bacteria and driver of IL-8 release through SAP-1  
149 phosphorylation, antimicrobial peptides (*REG1/3B*) and cytokine responsive elements (*NOS2*  
150 and *HSD3B2*), though expression of these markers was consistently lower in the middle  
151 versus bottom villus cluster. *HSD3B2*, a steroid synthetase essential for progesterone  
152 production, has been shown to modulate local cytokine and repair mechanisms, highlighting

153 the epithelium as not simply a physical barrier, but a key component of the inflammatory  
154 cascade, including extra-adrenal steroid production [26], [27].

155

156 The small sample sizes commonly used in single-cell differential gene expression studies,  
157 combined with the technical and biological variability inherent in single-cell analyses of  
158 complex tissues, have made it difficult to validate discoveries of differentially expressed genes  
159 and pathways. This has led to claims that the field of single-cell sequencing is facing a  
160 reproducibility crisis [28], [29], [30]. To directly assess the replicability of our analyses, all 343  
161 samples in the study were randomly allocated to either a 'discovery' or 'replication' cohort.  
162 First, the 70 samples in the atlasing cohort were equally distributed at random between the  
163 two cohorts to minimize bias introduced by variation in the accuracy of cell atlasing. The  
164 remaining samples not included in the atlasing cohort were then randomly assigned to either  
165 cohort. Ultimately, the discovery cohort consisted of 57 CD (29 with inflamed and 28 with  
166 uninfamed CD) and 114 healthy individuals, while the replication cohort included 54 CD (35  
167 with inflamed and 19 with uninfamed CD) and 118 healthy controls (Fig. 2a). No significant  
168 differences were observed in baseline demographics between the two cohorts (Table S3). The  
169 cell-type classifier was then applied to auto-annotate all 611,992 QC passing cells in the  
170 discovery cohort and 573,869 cells in the replication cohort (Methods).

171

172 Within the atlasing cohort we had both the original and auto-annotation cell labels, and were  
173 able to quantify the agreement. Overall, the auto-annotation classifier performed well, with  
174 similar agreement in annotation between discovery and replication cohorts, demonstrated by  
175 high correlation in specifically expressed genes between the original and auto-annotated  
176 clusters (Pearson's  $R > 0.77$ ) (Fig. S4; Methods). As expected, the accuracy of the  
177 autoannotator varied between cell-types, with 49 cell types showing an annotation  
178 concordance of more than 50% (Fig. S5). Eight cell types exhibited poor annotation  
179 concordance (with fewer than 50% of cells concordantly annotated) - plasmacytoid dendritic  
180 cells and conventional dendritic cells type 2 (pDCs/cDC2),  $GZMK^+$  and tissue-resident  $CD8^+$   
181 T cells,  $OLFM4^+$  stem cells,  $XBP1/CD38^{+++}$  and  $XBP1/CD38^{++++}$  plasma B cells, and top / mid  
182 villus  $IFI27^+$  enterocytes. Somewhat reassuringly, misannotation was often between  
183 transcriptomically similar cells. For example, misannotated plasma B  $XBP1/CD38^{+++}$  cells  
184 were almost exclusively classified as plasma B  $XBP1/CD38^{++}$  cells, and misannotated  $OLFM4^+$   
185 stem cells were predominantly classified as  $OLFM4^+$  epithelial progenitors.

## 186 Identification and replication of dysregulated genes in Crohn's disease.

187 Across each of the 57 clusters, we compared mean gene expression between inflamed CD  
188 biopsies and uninfamed biopsies from healthy individuals. To directly assess replicability, this  
189 was performed within both the discovery and replication cohorts independently, and across  
190 the two cohorts combined (full cohort) (Fig. 2a). We found 4241 unique differentially expressed  
191 genes (DEGs) in the discovery cohort, 4166 unique DEGs in the replication cohort, and 5385  
192 unique DEGs in the full cohort (Table S4; false discovery rate [FDR] < 5%). As expected, the  
193 total number of DEGs for each major cell population was positively correlated ( $R_{\text{Discovery}} = 0.66$ ,  
194  $R_{\text{Replication}}=0.52$ ,  $R_{\text{Full}}=0.73$ ) with the number of sequenced cells (Fig. S6a), albeit with variation  
195 at the level of individual cell types (Fig. S6b). For example, secretory epithelial cells,  
196 enterocytes and T cells had the highest number of DEGs in the full cohort (totals of 6527, 6324  
197 and 4866, respectively), while plasma B cells had only 719 DEGs, despite the large number  
198 of sequenced cells (~71k in full cohort).

199 We hypothesised that power to detect and replicate DEGs across our cohorts might  
200 be affected by the transcriptional variability (either technical or biological) of individual cell  
201 types. To assess this, we compared the gene-expression fold change estimates from our  
202 differential gene expression tests between our discovery and replication cohorts (Fig. 2b).  
203 When comparing the major cell populations, epithelial cells were the most replicable (mean  
204  $R=0.76$ ) and plasma B cells the least (mean  $R=0.56$ ). However, while eight of the top ten most  
205 replicable cell types were within the epithelial cell lineage, all major cell populations showed  
206 wide variation in fold-change replicability between constituent cell-types. For example, the  
207 fold-changes estimates were replicable for gamma-delta T cells ( $R=0.82$ ), but less so for  
208  $LEF1^+$  T cells ( $R=0.28$ ) or  $CD8^+$  tissue-resident T cells ( $R=0.32$ ) (Table S5). There was also  
209 significant variation in fold-change correlation between individual cell-types in the myeloid  
210 compartment, with  $ITGA4^+$  macrophages demonstrating the best agreement ( $R=0.88$ ) and  
211 pDCs/cDC2s the least ( $R=0.12$ ). Four of the ten cell types with a fold-change correlation less  
212 than 0.5 (pDCs/cDC2, tissue-resident  $CD8^+$  T cells,  $OLFM4^+$  stem cells,  $XBP1/CD38^{+++}$  and  
213  $XBP1/CD38^{++++}$  plasma B cells) showed poor annotation consistency between the manual and  
214 auto-annotation approaches in the atlasing cohort (fewer than 50% of cells concordantly  
215 annotated). This highlights the importance of accurate and consistent cell annotation for  
216 single-cell RNA-seq studies to ensure reliable differential gene expression analysis. Two  
217 myeloid cell types ( $SOD2^+$  monocytes and  $CCL3/4^+$   $CXCL9/10^+$  macrophages) showed poor  
218 fold-change correlations ( $R<0.5$ ) despite high consistency between the manual and auto-  
219 annotation (>98% of cells concordantly annotated). The poor replicability observed for these  
220 cell-types was instead likely underpinned by imbalance in the number of cells from cases and  
221 controls. Together, these factors make it difficult to accurately estimate mean gene-expression

222 for these cell-types, particularly in the controls, hindering power to detect differences in mean  
223 expression correlated with disease status.

224 Ultimately, only 44% of DEGs (FDR < 5%) detected in the discovery cohort were also  
225 significantly dysregulated (FDR < 5%) in the same cell type, with the same direction of effect,  
226 in the replication cohort. As anticipated, the correlation in gene-expression log-fold changes  
227 in our discovery and replication cohort underpinned the replication rate of differentially  
228 expressed genes. Consistent with this, the replicability of a given gene is highly cell-type  
229 dependent, with epithelial cells, particularly precursors/progenitors and stem cells  
230 demonstrating the most consistent differentially-expressed genes between cohorts.

### 231 **The Ileum undergoes both pan-epithelial and cell-type specific changes in CD** 232 **inflammation.**

233 To maximise power to identify biological pathways dysregulated in disease, we  
234 undertook gene set enrichment analysis (GSEA) across the differential gene expression  
235 results from our full cohort (Methods). To limit false-positive enrichments, we focussed this  
236 analysis on the 47 cell types with greatest replicability in our differential gene expression  
237 (DEG) analysis (Fig. 2b; Table S5; threshold  $R \geq 0.5$ ). Epithelial cells demonstrated the  
238 strongest correlation in fold change estimates ( $R=0.76$ ) of the three major cellular  
239 compartments, and in the full cohort we observed both cell-type specific and pan-epithelial  
240 pathway enrichments (Fig. 2c).

241 The most widespread pan-epithelial signature in CD inflamed versus healthy control  
242 samples was upregulation of “IFN $\alpha/\beta$  signalling”, detected in twelve epithelial cell types along  
243 the entire crypt-villus axis (Fig. 2c). Leading edge analysis showed that the genes driving the  
244 observed enrichments for “IFN $\alpha/\beta$  signalling”, namely *IFI27*, *HLA-A/B/C/E/F*, *IFITM3*, *PSMB8*,  
245 *STAT1* and *IRF1*, were differentially expressed across all twelve cell types (Table S6). Many  
246 of these leading edge genes also featured in other significantly enriched pan-epithelial  
247 pathways, including *HLA-A/B/C/E/F* and *PSMB8* in the upregulation of “Antigen processing  
248 cross-presentation”, “Folding-assembly, peptide loading of class I MHC”, “ER phagosome”  
249 and “Endosomal vacuolar pathway”. To determine whether IFN $\alpha/\beta$  signalling enrichment  
250 persisted in patients who had successfully resolved macroscopic inflammation, we undertook  
251 differential gene expression analyses across the twelve IFN $\alpha/\beta$ -enriched cell types, comparing  
252 cells from uninfamed CD biopsies to those from healthy controls (Fig. 2c). We did not observe  
253 an enrichment of differentially expressed genes in the IFN $\alpha/\beta$  pathway, except for a weak but  
254 statistically significant enrichment in “stem cells *MKI67*” in the uninfamed CD versus healthy  
255 biopsy comparison. This suggests that the enrichment of Type I IFN signalling across epithelial



256 cell types in active CD is a widespread barrier response to injury that largely subsides after  
257 repair.

258 Type I interferon (IFN- $\alpha/\beta$ ) and type II interferon (IFN- $\gamma$ ) have long been implicated in  
259 the upregulation of MHC-I expression and components of its pathway [31], [32], [33].  
260 Consistent with this, genes differentially expressed between cells from CD inflamed versus  
261 healthy biopsies were enriched in the “folding assembly peptide loading of class I MHC”  
262 pathway, including (*CANX*, *CALR*, *TAPBP*, *B2M*), across 12 individual epithelial cell types  
263 representing all major subtypes (Table S6). However Type II IFN responses, through the “IFN $\gamma$   
264 signalling” pathway, appeared more restricted, with enrichment preferentially to enterocytes  
265 along the entire crypt-villus axis, but not in other epithelial cell types, e.g. secretory cells (Fig.  
266 2c). Given that multiple MHC-I pathways and associated genes were consistently enriched  
267 across epithelial cell types, we speculated whether inflammation severity was associated with  
268 the strength of this effect. To test this, we fit a differential expression (DE) model for CD  
269 patients only stratified according to endoscopic severity of disease using the TI-SES-CD  
270 score. In this analysis, “MHC-I mediated antigen processing presentation”, “folding assembly  
271 peptide loading MHC-I” and “antigen processing cross-presentation” pathways remained  
272 enriched in all epithelial cell types except goblet cell top-villus and enteroendocrine subsets  
273 (Fig. S7a). This suggests a widespread dose-dependent effect of inflammation on MHC-I  
274 upregulation. Importantly, analyses comparing non-inflamed CD to those from healthy controls  
275 showed that this upregulation of MHC-I antigen-presentation persisted even after the  
276 resolution of inflammation (Fig. 2c).

277 Whilst MHC-I is expressed by all cells, MHC-II expression is thought to be restricted to  
278 professional antigen presenting cells to limit activation of the adaptive immune system through  
279 T cell receptor engagement. However, in the context of inflammation, intestinal epithelial cells  
280 have been shown to upregulate MHC-II molecules [18], [13], [34], [35]. Consistent with this,  
281 we also observed upregulation of some MHC-II signaling genes (*HLA-DRA*, *HLA-DRB1*, *HLA-*  
282 *DPA1*, *HLA-DRB5*, *HLA-DQB1* and *HLA-DMB*) but only within specific enterocyte and stem  
283 cell subsets (mid villus *ALDOB*<sup>+</sup>, mid villus *IFI27*<sup>+</sup>, progenitor crypt *OLMF4*<sup>++</sup> and *MKI67*<sup>+</sup> stem)  
284 (Fig. S7b). Thus MHC-II signalling upregulation was less widespread across epithelial cells  
285 compared to MHC-I.

286 Collectively these results suggest widespread changes across epithelial sub-types  
287 relating to Type I IFN and MHC-I signalling, with these changes associated with inflammation  
288 severity. Importantly, these perturbations in MHC-I signalling may persist in key progenitor  
289 cells long after the initial inflammatory stimuli have been removed. Alongside these changes  
290 in immune potential in epithelial cells, we also detected evidence of shifts in metabolic function

291 with evidence of alterations in pathways and genes associated with both oxidative  
292 phosphorylation and glycolysis (Fig. S7c).

### 293 ***ITGA4*<sup>+</sup> macrophages are enriched for JAK/STAT signalling in ileal CD inflammation**

294 Genetic variants associated with increased expression of *ITGA4* (CD49d) in stimulated  
295 monocytes have been associated with increased risk of IBD [3]. *ITGA4* is known to be  
296 expressed by a range of circulating lymphocytes, including classical monocytes, where it forms  
297 the  $\alpha 4\beta 7$  integrin that is the target of the IBD therapeutic, vedolizumab. Anti- $\alpha 4\beta 7$  therapy  
298 abrogates blood monocyte MADCAM-endothelium interactions, with circulating levels of  $\alpha 4\beta 7^+$   
299 classical monocytes higher, and tissue monocytes lower, in vedolizumab non-responders [36],  
300 [37]. In our terminal ileum cell atlas, *ITGA4* was most highly expressed by two myeloid  
301 populations, *ITGA4*<sup>+</sup> macrophages and *CD163*<sup>++</sup> macrophages (Fig. S1).

302 In patients with active CD, *ITGA4*<sup>+</sup> macrophages constituted a higher mean proportion  
303 of myeloid cells within inflamed tissue (16%) compared to healthy controls (10%) (Fig. S3a).  
304 These cells also demonstrated the highest reproducibility in our differential gene expression  
305 analysis, with a correlation coefficient of  $R=0.88$  (Table S5). Gene set enrichment analysis  
306 revealed that differentially expressed genes in *ITGA4*<sup>+</sup> macrophages were enriched across a  
307 wide array of cytokine pathways, including interleukins (IL) 1, 4, 6, 9, 10, 12, 13, 20, 21, 23,  
308 27 and 35 (Fig. S3b). These cytokines suggest a predominant role of signalling through  
309 receptors of the IL-6 and interferon (IFN) superfamilies, predominantly mediated by Janus  
310 kinases (JAK) *JAK1/2* and *TYK2* [38], [39]. Concordantly, *JAK2* and *STAT1* were the most  
311 overexpressed genes in our differential gene expression analysis, with *JAK2* and multiple  
312 *STAT* isoforms (*STAT1/2/3*) identified as key mediators in the leading-edge genes across the  
313 enriched pathways. Negative regulators of JAK/STAT signalling, such as *PTPN1/2*, were also  
314 upregulated in *ITGA4*<sup>+</sup> macrophages and were leading edge genes in a number of enriched  
315 pathways, including “IL-1 signalling”, “Signalling by interleukins” and “Cytokine signalling in  
316 immune system”. Furthermore, we found that the expression of genes in many of these  
317 enriched cytokine signalling pathways, including IL-10, IL-12 and IL-20, were positively  
318 correlated with inflammation severity (TI-SES-CD score) in *ITGA4*<sup>+</sup> macrophages (Fig. S3b).

319 Building on the observed correlations between IL-10 and IL-20 signalling in *ITGA4*<sup>+</sup>  
320 macrophages and the severity of inflammation in active CD, we further investigated the  
321 potential involvement of IFN super-family receptors. Notably, *ITGA4*<sup>+</sup> macrophages  
322 upregulated genes associated with proteasome (e.g., *PSMA4/5*) and immunoproteasome  
323 (e.g., *PSMB8/9*) complex formation, that are known to be dependent on IFN signalling (Fig.  
324 3c). While the proteasome primarily facilitates the normal degradation of proteins, the  
325 immunoproteasome is upregulated in response to pro-inflammatory signals such as Type II

326 IFN, enhancing the generation of peptides from pathogen-derived proteins for MHC-I-  
327 mediated presentation to  $CD8^+$  T cells. This extensive engagement in protein catabolism and  
328 antigen presentation suggests that  $ITGA4^+$  macrophages may play a crucial role in amplifying  
329 adaptive immune responses in the local tissue environment.

330 Taken together, our findings show that  $ITGA4^+$  macrophages are over-represented in  
331 CD inflammation and preferentially express an array of cytokine signalling pathways. The  
332 specific repertoire of interleukins suggest IL-6 and IFN super-family receptor signalling with  
333 resultant JAK activation, particularly JAK2, with inflammation-dependent increases in *IL-10*,  
334 *IL-12* and *IL-20*. These cells further demonstrate the effects of Type II IFN signalling, with  
335 enrichment for many pathways involved in immunoproteasome-MHC-I communication,  
336 suggesting an active role in cytokine sensing, signalling and adaptive immune-cell cross-talk.

### 337 **IBD-associated genes are expressed across all major cell populations of the gut.**

338  
339 Genome-wide association studies have identified more than 300 regions of the human  
340 genome associated with IBD susceptibility. Translating these genetic discoveries into  
341 biological understanding and therapeutic hypotheses requires elucidation of the cell types in  
342 which they are operative. High resolution single-cell atlases are beginning to deliver these  
343 important insights, with previous studies identifying cell types that highly express some IBD-  
344 associated genes [17], [40]. To build on these efforts, we compared gene-expression  
345 specificity scores across the 57 cell-types in our atlas for 45 high confidence candidate effector  
346 genes (Methods) from IBD genome-wide association studies (Fig. 4). All eight major cell  
347 populations showed specific expression of at least one IBD effector gene, highlighting the  
348 complex cellular architecture of IBD and the absence of a single, dominant cell-type or  
349 pathway underlying pathology. For example, *FUT2* was specifically expressed by  
350 *IFI27/KRT20*-positive enterocytes (mean specificity = 0.7) but not differentially so between CD  
351 cases and controls (Table S4). *FUT2* co-ordinates synthesis of the carbohydrate HBGA,  
352 responsible for ABO blood group system, but these antigens are also secreted in mucosal  
353 tissue sites. Indeed, *FUT2* mutations that increase IBD risk have been associated with 'non-  
354 secretor' status of these antigens, which in turn impair attachment of *Bifidobacteria* and  
355 *Lactobacilli*. Abrogation of *FUT2* expression, either via transgenic approaches or naturally  
356 occurring genetic polymorphisms, results in dysbiosis and increased susceptibility to  
357 inflammation [41], [42]. We show that *FUT2* is predominantly expressed by enterocytes and  
358 stem cells (specificity > 0.5) compared to other major cell populations (specificity < 0.36), with  
359 expression greatest in precursors/progenitors and falls progressively as enterocytes mature  
360 up the crypt.

361 A small subset of coding mutations in *NOD2* comprise the strongest genetic effects on  
362 ileal CD in Western populations, and have been suggested to impair handling of intra-cellular  
363 bacteria by myeloid cells [43], [44], [45]. We observed specific expression of *NOD2* in  
364 monocytes (*S100A8/9*<sup>+</sup> and *SOD2*<sup>+</sup>) and immature (e.g. *ITGA4*<sup>+</sup> and *CXCL9/10*<sup>+</sup> cells) (mean  
365 specificity=0.8), but not resident (e.g. *CD163*<sup>+</sup> and *CD163*<sup>++</sup> cells) macrophages (mean  
366 specificity=0.2). Across all of these cell types we found no evidence of *NOD2* differential  
367 expression between CD-inflamed biopsies and those from healthy individuals (Table S4).  
368 Given that these *NOD2*<sup>+</sup> cell types are also known to be rapidly recruited from blood as a  
369 critical component of the response to intestinal damage [46], impaired bacterial handling in  
370 the initial emergency response by these cells may lead to microbial persistence and represent  
371 an early triggering event for chronic immune activation. Three of these *NOD2*<sup>+</sup> cell types  
372 (*SOD2*<sup>+</sup> monocytes, *S100A8/9*<sup>+</sup> monocytes and *CXCL9/10*<sup>+</sup> macrophages) were also the sole  
373 source of oncostatin M (*OSM*) in our data (mean specificity=0.9). Oncostatin M has been  
374 suggested as a potential biomarker and therapeutic target in IBD, that induces an inflammatory  
375 programme including *IL6*, *CXCL9* and *CXCL10* in stromal cells, with high pretreatment levels  
376 associated with anti-TNF failure [47]. The cognate receptor, *OSMR*, has been shown to be  
377 expressed on CD45<sup>+</sup>EpCAM<sup>+</sup>CD31<sup>-</sup> cells and its expression is co-linear with *COL1A1*, *FAP*  
378 and *PDPN* fibroblast markers [47], at whole tissue level. In our study, we confirm cell-specific  
379 expressions of *OSMR* within fibroblast, endothelial and pericyte subpopulations of  
380 mesenchymal cells (specificity=0.74, 0.72, 0.67, respectively). These observations collectively  
381 demonstrate the utility of continuing to build comprehensive cellular atlases to enhance the  
382 interpretation of genetic association studies of IBD.

### 383 **Heritability enrichment analysis identifies disease relevant cell types for CD and UC.**

384 As well as assigning putative effector cell types to specific genetic risk loci, we also  
385 sought to identify cell-types of pathologic relevance based upon correlation of cell type specific  
386 gene-expression scores with genome-wide maps of genetic susceptibility for CD, UC and IBD.  
387 Genome-wide summary statistics for height and educational attainment were used as negative  
388 controls in these heritability enrichment analyses [7], [48], [49], [50].

389 Only cell types of the innate and adaptive immune system showed enrichment of  
390 heritability for CD, UC and IBD. Among innate immune cells, specifically expressed genes  
391 within *S100A8/9*<sup>+</sup> and *SOD2*<sup>+</sup> monocytes, *CXCL9/CXCL10*<sup>+</sup> macrophages, *CD163*<sup>+/++</sup> and  
392 cDC1s were significantly enriched for CD but not UC heritability (Fig. 5; FWER < 0.05). This  
393 suggests a potential causal role for cell types involved in both inflammatory responses  
394 (*S100A8/9*<sup>+</sup> monocytes, *CXCL9/10*<sup>+</sup> macrophages) and immune tolerance (*CD163*<sup>+</sup>  
395 macrophages and cDC1s) in the pathogenesis of CD. Furthermore, myeloid populations with

396 genes significantly enriched for CD heritability, including *S100A8/9*<sup>+</sup> monocytes, *SOD2*<sup>+</sup>  
397 monocytes and *CCL3/4*<sup>+</sup> *CXCL9/10*<sup>+</sup> macrophages, were significantly reduced in healthy  
398 samples (Fig. S8;  $p$  adj < 0.05, t-test). Within the adaptive immune compartment, genes  
399 specifically expressed by *CD4*<sup>+</sup> memory/*CXCR6*<sup>+</sup> T cells, Tregs, *TRGC2*<sup>+</sup> *CD8*<sup>+</sup> T cells and  
400 *CD4*<sup>-</sup> *CD8*<sup>-</sup> T cells were enriched for both CD and UC heritability, whereas *CD8*<sup>+</sup> tissue-  
401 resident T cells and gamma-delta T cells were specifically enriched in CD (Fig. 5; FWER <  
402 0.05).

## 403 Discussion

404  
405 scRNA-seq is a transformative tool for elucidating the intricate interplay of genes,  
406 pathways, and cell types in chronic inflammatory diseases such as Crohn's disease. However,  
407 the inherent biological complexity of these diseases results in significant inter-patient variability  
408 in molecular traits like gene expression. This variability is further exacerbated by technical  
409 variance—often stemming from poorly understood factors associated with biopsy collection,  
410 tissue dissociation, and scRNA-seq protocols—posing substantial challenges to accurately  
411 quantifying gene expression differences between groups (e.g., cases vs. controls). These  
412 issues are compounded by the historically small sample sizes of scRNA-seq studies and the  
413 frequent absence of replication cohorts to validate findings.

414 To overcome these limitations, we established IBDverse, the largest patient cohort to  
415 date for scRNA-seq of terminal ileum biopsies, incorporating both discovery and replication  
416 cohorts. We standardized biopsy collection and processing from all 343 patients at a single  
417 center, employing consistent protocols for tissue dissociation, single-cell capture, sequencing,  
418 and data analysis. Furthermore, we developed a custom auto-annotation model trained on our  
419 dataset to reduce technical variability. Despite these rigorous measures, fewer than 50% of  
420 differentially expressed genes identified in the discovery cohort were replicated in the  
421 validation cohort. Replicability varied markedly across cell types, with poorly annotated or rare  
422 populations exhibiting particularly low replication rates. For instance, the scarcity of *S100A8/9*<sup>+</sup>  
423 monocytes and *CXCL9/CXCL10*<sup>+</sup> macrophages in healthy biopsies limited our ability to  
424 reliably detect differentially expressed genes. Larger studies are essential to improve detection  
425 of differentially expressed genes in these disease-relevant but underrepresented cell types.

426 Additionally, the variable transcriptional plasticity of immune cells—shaped by factors  
427 such as diet, inflammation severity, disease stage, and treatment regimens—likely contributes  
428 to low replication rates. Notably, Crohn's disease patients in our cohort exhibited wide variation  
429 in treatment histories, which likely influenced the observed transcriptomic profiles of immune  
430 cells in particular. Our findings underscore the challenges of conducting scRNA-seq

431 differential gene-expression studies on complex, heterogeneous patient populations, and  
432 highlight the need for caution particularly when interpreting unreplicated findings from small-  
433 scale differential gene expression studies.

434

435 We identified a consistent barrier response in the intestinal epithelium, centered on  
436 Type I and Type II interferon (IFN) signalling. Genes involved in MHC-I function and Type I  
437 IFN pathways were significantly upregulated across the entire crypt-villus axis. This pan-  
438 epithelial MHC-I response to barrier damage was largely absent in other cell types and  
439 persisted even after resolution of macroscopic inflammation. These findings suggest that  
440 inflammation conditions the intestinal barrier, leaving a molecular scar within epithelial  
441 progenitors that persists after the resolution of inflammation and likely influences response to  
442 future insults. This aligns with recent work by Dennison et al. [51] in pediatric IBD, showing  
443 that loss of DNA methylation at MHC-I loci, including *NLRC5*, enhances MHC-I gene  
444 expression in epithelial organoids. We demonstrate that MHC-I expression remains elevated  
445 post-inflammation in adult patients, particularly in stem-like progenitor cells such as *OLFM4*<sup>+</sup>  
446 and *MKI67*<sup>+</sup> populations.

447 The persistent elevation of MHC-I expression following resolution of macroscopic  
448 inflammation is likely to have significant implications for barrier function, perhaps via non-  
449 canonical antigen presentation by intestinal epithelial cells (IECs) [52]. Exogenous antigens  
450 can access late endosomal compartments in IECs and colocalize with MHC-I proteins in  
451 patients with Crohn's disease (CD), raising the possibility of "cross-presentation." This process  
452 may enable IECs to present luminal antigens to CD8<sup>+</sup> T cells, highlighting a potential role for  
453 epithelial cells in shaping immune responses. This phenomenon of cross-presentation of  
454 exogenous antigen by non-professional APCs has been reported in murine renal epithelium  
455 [53], and liver endothelium [54], and in the context of the intestine suggests that epithelial cells  
456 play an active role in shaping local inflammatory responses that may be dysregulated in CD.

457 Epithelial MHC-I expression driven by interferon (IFN) signalling has been observed in  
458 various tissues and disease contexts. For instance, during murine *Citrobacter* spp. infection,  
459 IFN- $\gamma$  sensing in the intestinal epithelium facilitates both pathogen and self-antigen  
460 presentation to intraepithelial T cells via IRF1 and MHC-I, which suppresses NLRP3  
461 macrophage inflammasome activation. Notably, mice with transgenic deletion of IFN- $\gamma$   
462 sensing (*Ifngr*<sup>fl/fl</sup>/*flVilCre*) exhibit reduced IRF1/MHC-I signalling and resistance to anti-TNF  
463 therapy [55]. Building on these findings, our data demonstrate that increased epithelial Type  
464 II IFN responses are predominantly restricted to enterocytes along the crypt-villus axis and  
465 resolve following tissue repair.

466

467           Macrophages are among the most abundant leukocytes in the gastrointestinal tract,  
468 forming a dense network around the epithelial barrier and playing critical roles in intestinal  
469 health [46]. Their dysregulation is strongly associated with chronic inflammatory diseases such  
470 as IBD [56], [46]. During active disease, intestinal monocytes and their macrophage progeny  
471 accumulate in large numbers, producing pro-inflammatory cytokines like TNF, IL-1 $\beta$ , IL-6, and  
472 IL-23 [57], [58], [59]. Although macrophages are hypothesized to be key targets of IBD  
473 therapies [46], their heterogeneity, especially in disease states, remains poorly understood. In  
474 this study, we identified a transcriptionally distinct population of *ITGA4*<sup>+</sup> macrophages that  
475 become more abundant during intestinal inflammation. Differentially expressed genes in these  
476 cells are enriched in nine cytokine pathways, including IL-6, IL-12, and IL-23. This response  
477 is underpinned by a core JAK/STAT gene signature, with JAK2 and STAT1/2/3 being  
478 significantly differentially expressed. Given that JAK inhibitors, which target multiple cytokine-  
479 dependent pathways (e.g., IL-6, IL-10, and IL-23), are now effective therapies for IBD,  
480 understanding their cellular targets is critical. Importantly, macrophages from IBD patients  
481 carrying disease associated polymorphisms in JAK2 display enhanced JAK2 expression and  
482 NOD2-induced JAK2 phosphorylation, and amplified cytokine signalling [60]. Moreover, JAK2-  
483 deficient macrophages fail to upregulate MHC-I proteins in response to Type I IFN stimulation,  
484 increasing susceptibility to infection and inflammation [61], [62]. We identify *ITGA4*<sup>+</sup>  
485 macrophages as a novel, preferential source of JAK/STAT signalling and downstream  
486 cytokine responses in Crohn's disease, highlighting their potential as therapeutic targets.

487           Specifically expressed genes from multiple cell-types within the innate and adaptive  
488 immune system were enriched with heritability, highlighting their involvement in disease  
489 pathogenesis. The strong enrichment of CD heritability among *CXCL9/10*<sup>+</sup> macrophages,  
490 *SOD2*<sup>+</sup> and *S100A8/9*<sup>+</sup> monocytes is particularly noteworthy given both populations are  
491 significantly expanded in disease and highly express inflammatory cytokines and known CD  
492 susceptibility genes such as *NOD2*, *PTAFR* and *LRRK2*. Unfortunately, we were unable to  
493 detect many reproducible differentially expressed genes in these important cell types, likely  
494 due to the rarity of these cells in biopsies from healthy individuals. Whilst we did not identify  
495 heritability enrichment within non-immune cell populations, this does not mean that these cells  
496 do not contribute to disease pathology. We note that heritability enrichment in non-immune  
497 cells has been reported previously, for example within M cells in UC [63]. Our data shows that  
498 several likely effector genes within IBD associated loci are specifically expressed by non-  
499 immune cells, including *RNF186* [64], *FUT2* [65], *PDLIM5* [4] and *HNF4A* [66]. The  
500 underrepresentation of stromal cells in our atlas due to a combination of using pinch biopsies  
501 and digestive enzymes that favour epithelial cell capture likely also reduces our power to  
502 detect enrichments in these cell types.

503

504 In summary, we present IBDverse, the largest single-cell RNA sequencing (scRNA-  
505 seq) dataset of terminal ileal biopsies, comprising over 1.1 million cells from 111 Crohn's  
506 disease (CD) patients and 232 healthy controls. Using both discovery and replication cohorts,  
507 the study identifies and validates differentially expressed genes, pathways, and cell types  
508 associated with CD. We find widespread epithelial changes driven by interferon signalling and  
509 persistent MHC-I upregulation post-inflammation, and a distinct population *ITGA4* expressing  
510 macrophages that are major contributors to JAK/STAT signalling and cytokine production.  
511 Heritability analysis highlights the involvement of immune cell populations, such as *CXCL9/10*<sup>+</sup>  
512 macrophages and *S100A8/9*<sup>+</sup> monocytes, in CD pathogenesis. These results provide a  
513 valuable resource for understanding CD mechanisms and identifying potential therapeutic  
514 targets. An open-access portal for navigating our single-cell data resource has been launched  
515 at <https://www.ibdverse.info/>.

516

## 517 Acknowledgements

518 This research was supported by the NIHR Cambridge Biomedical Research Centre (BRC-  
519 1215-20014). The views expressed are those of the authors and not necessarily those of the  
520 NIHR or the Department of Health and Social Care. This research was funded in part by the  
521 Wellcome Trust [Grant numbers 206194 and 108413/A/15/D], The Crohn's Colitis Foundation  
522 Genetics Initiative [Grant numbers 612986 and 997266] and Open Targets [OTAR2057].

523

524 We thank all individuals who kindly donated samples and their time to the study. We thank  
525 Vladimir Kiselev and Martin Prete for setting up the cellxgene interactive data explorer and  
526 Henry J Taylor for input on differential gene expression analysis. We also thank Kylie R James  
527 for her assistance with providing cell type markers.

## 528 Author contributions

529 Statistical analysis and manuscript drafting, M.K., T.A., D.L.T. and G.R.J.;

530 Sample collection, K.A., W.G., B.B., and C.Q.C.; Sample processing, M.H.G., M.S., N.W.,  
531 J.S., J.O., M.X.H., K.A.C., and R.E.M.; Clinical information, N.N. ; Critical discussion M.J.P.,  
532 L.R.N, R.E.M., R.S., V.P., C.P.J., C.C., and M.P.; Data processing M.T., M.O., G.N., S.L., V.I.,  
533 and Y.G; Writing – Review & Editing, D.C., B.T.H., R.E.M., T.R. and C.A.A.; Conceptualization  
534 and Supervision, T.R., C.A.A.

535



## 536 Declaration of interests

537 C.A.A. has received research grants or consultancy/speaker fees from Genomics plc,  
538 BridgeBio, GSK and AstraZeneca. T.R. has received research/educational grants and/or  
539 speaker/consultation fees from Abbvie, Arena, Aslan, AstraZeneca, Boehringer-Ingelheim,  
540 BMS, Celgene, Ferring, Galapagos, Gilead, GSK, Heptares, LabGenius, Janssen, Mylan,  
541 MSD, Novartis, Pfizer, Sandoz, Takeda and UCB. D.C. is now an employee at AstraZeneca  
542 and R.M. is an employee at Relation Therapeutics.

543

## 544 Materials and Methods

### 545 Sample ascertainment

546 This study was approved by the National Health Service (NHS) Research Ethics Committee  
547 (Cambridge South, REC ID 17/EE/0338). Written informed consent was given by all  
548 participants.

549

550 Individuals undergoing routine endoscopic assessment were recruited at Addenbrooke's  
551 hospital, Cambridge, UK. Clinical information and metadata for the participants are provided  
552 in Table S1. All CD participants classified as 'inflamed' had a confirmed history of CD and  
553 macroscopic evidence of terminal ileal inflammation from tissue sampled during the biopsy.  
554 All control participants were undergoing endoscopic assessment or surveillance for healthy  
555 and non-cancer related reasons (e.g., history of iron deficiency anaemia, family history of  
556 colorectal cancer). Control participants did not have macroscopic evidence of intestinal  
557 inflammation, a personal history of cancer, and were not in receipt of corticosteroids or any  
558 other immune modulating therapy. Patients who were taking probiotics or antibiotics were  
559 excluded. Patients of non-European ancestries were also excluded to reduce confounding.  
560 Pinch-biopsies of the terminal ileum were collected from all participants and deposited into  
561 pre-chilled Hanks Balanced Salt Solution (HBSS) without  $Mg^{2+}$ ,  $Ca^{2+}$ , or phenol red. Samples  
562 were placed on ice and immediately transferred to the Sanger Institute.

### 563 Single-cell RNA isolation and sequencing

564 Terminal ileal biopsies were dissociated using a single-step digestion protocol on ice to  
565 release all major intestinal cell types present in the biopsy (epithelial, immune, and stromal)  
566 without stressing the cells. First, the biopsies were mechanically minced and pipetted to  
567 release immune cells (fraction 1) from the lamina propria and the remaining tissue chunks  
568 were transferred to HBSS<sup>-</sup> containing 2 mM EDTA, 0.26 U/ $\mu$ l serine endoprotease isolated

569 from *Bacillus licheniformis* (Sigma, P5380), 5  $\mu\text{M}$  QVD-OPh (Abcam, ab141421), and 50  $\mu\text{M}$   
570 Y-27632 dihydrochloride (Abcam, ab120129). Tissue chunks were pipetted regularly during a  
571 30 minute incubation on ice to release epithelial and stromal cells (fraction 2). The cells from  
572 both fractions are washed, centrifuged, and then incubated for 10 minutes at room  
573 temperature in Hank's Balanced Salt Solution (HBSS) with  $\text{Mg}^{2+}$ ,  $\text{Ca}^{2+}$ , and without phenol  
574 red—including 5 mM  $\text{CaCl}_2$ , 1.5U/ $\mu\text{l}$  collagenase IV (Worthington, LS004188), and 0.1 mg/ml  
575 DNase I (Stem Cell Technologies, 07900). The cells were then filtered (30  $\mu\text{m}$ ; CellTrics 04-  
576 0042-2316), washed, and centrifuged before being incubated for 3 minutes at room  
577 temperature in the red blood cell lysis buffer (ACK lysis buffer; Gibco, A10492). Two final  
578 washes and centrifugations were performed before a final filtration (40  $\mu\text{m}$ ) and manual cell  
579 counting (haemocytometer, NanoEnTek, DHC-N01).

580

581 Single-cell RNA sequencing was undertaken using 3' 10X Genomics kits (v3.0 and v3.1)  
582 according to the manufacturer's instructions. All samples sequenced under kit version v3.1  
583 had dual indexes, samples sequenced under kit version v3.0 had either single or dual indexes.  
584 We targeted 6,000 cells for CD participants and 3,000 cells for controls to account for the  
585 increased cellular heterogeneity in CD biopsies. Since the proportions of immune cells vary  
586 with inflammation status, we altered the ratio of cells from fractions 1 and 2 in an attempt to  
587 make the representation of cell types more equal. Viability of the mixed populations was  
588  $92\pm 9\%$  (mean  $\pm$  S.D.) according to Trypan blue staining. Libraries were sequenced using a  
589 HiSeq4000 sequencer (Illumina;  $N_{\text{CD}}=20$ ,  $N_{\text{control}}=4$ ) or NovaSeq S4 XP sequencer (Illumina;  
590  $N_{\text{CD}}=91$ ,  $N_{\text{control}}=228$ ) with 100bp paired-end reads, targeting 50,000 reads per cell. We  
591 compared the fraction of reads mapped confidently to the transcriptome (output metric from  
592 CellRanger) within CD and healthy participants and found no difference between sequencers  
593 (minimum p-value  $> 0.05$ , Wilcoxon rank sum test).

594 Single-cell RNA-seq processing and quality control procedures

595 CellRanger v7.2.0 was used to demultiplex reads, align reads to GRCh38 with Ensembl  
596 version 93 transcript definitions (GRCh38-3.0.0 reference file distributed by 10X Genomics),  
597 and generate cell by gene count matrices. CellBender v2.1 [67] was then applied to identify  
598 droplets containing cells and adjust the raw counts matrix for background ambient transcript  
599 contamination. For training, CellBender requires a rough estimate of the number of droplets  
600 containing cells (cell droplets) and the number of droplets without cells (empty droplets)  
601 derived from the UMI curve—the rank ordering droplet barcodes according to total UMI counts  
602 (x axis) by the total number of UMI counts per droplet (y axis). The UMI curve was calculated  
603 from droplets with a UMI count  $> 1,000$ , and the threshold estimated using the “barcoderanks-

604 inflection” procedure from DropletUtils v1.9.16 [68]. To estimate the number of empty droplets,  
605 we calculated the UMI curve as described above, selected droplets with a UMI count between  
606 250 and 10, and estimated the threshold by performing both the “barcoderanks-inflection” and  
607 “barcoderanks-knee” procedure from DropletUtils—using 1/3rd of the distance between the  
608 two estimates as the final threshold. CellBender was run with default parameters except for  
609 excluding droplets with <10 UMI counts (--low-count-threshold) and using 300 epochs with a  
610 learning rate of  $1 \times 10^{-7}$ . The final counts matrix was adjusted for the ambient transcript  
611 signature at a false positive rate of 0.1. Next, multiplets were identified and removed using  
612 scrublet v0.2.1 [69], simulating 100,000 multiplets and calculating the multiplet threshold using  
613 the threshold\_li function from the scikit-image package v0.17.2 [70], initialised using the  
614 threshold\_otsu function. The reported sex of each sample was verified by generating  
615 pseudobulk expression matrices and comparing the expression of *XIST* to the mean  
616 expression of all genes on the Y chromosome.

#### 617 *De novo* cell type identification

618 The atlasing cohort was used to identify cell types and fit a model to automatically predict cell  
619 types across the entire dataset. First, additional filters were applied to ensure only the highest  
620 quality cells were used for *de novo* clustering. Cells with fewer than 100 genes expressed at  
621  $\geq 1$  count, or where the percentage of counts originating from the mitochondrial genome  
622 (<https://www.genenames.org/data/genegroup/#!/group/1972>) was  $> 50$ , were removed. Next,  
623 an isolation forest (scikit-learn v0.23.2) was used to remove outlier cells based on (i) the  
624 percentage of counts originating from the mitochondrial genome, (ii) the total number of UMI  
625 counts per cell, (iii) the number of genes expressed ( $\geq 1$  count) per cell. These metrics were  
626 selected following the recommendations in [71].

627  
628 Subsequent processing and management of the expression data was performed using scanpy  
629 v1.6.0 [72]. Genes expressed ( $\geq 1$  count) in five or fewer cells across the whole dataset were  
630 removed (sc.pp.filter\_genes with min\_cells=5). To account for variable sequencing depth  
631 across cells, unique molecular identifier (UMI) counts were normalised by the total number of  
632 counts per cell, scaled to counts per 10,000 (CP10K; sc.pp.normalise\_per\_cell), and the  
633 CP10K expression matrix ( $\ln[CP10K+1]$ ; sc.pp.log1p) was log-transformed.

634  
635 To perform dimensionality reduction, the 2,000 most variable genes across samples were  
636 selected by (i) calculating the most variable genes per sample and (ii) selecting the 2,000  
637 genes that occurred most often across samples (sc.pp.highly\_variable\_genes with

638 flavor='seurat' and batch\_key=sample). After mean centering and scaling the  $\ln(\text{CP10K}+1)$   
639 expression matrix to unit variance, principal component analysis (PCA; `sc.tl.pca`) was  
640 undertaken using the 2,000 most variable genes after removal of protein coding mitochondrial,  
641 ribosomal, and immunoglobulin genes, because these genes constituted the ambient  
642 signature learned by CellBender. To select the number of PCs for subsequent analyses, we  
643 used a scree plot [73] and calculated the “knee/elbow” derived from the variance explained by  
644 each PC using the kneedle estimator v0.7.0 [74]. From the automatically estimated elbow, we  
645 included five additional PCs in order to ensure all meaningful variability was captured,  
646 selecting 29 PCs for clustering. Finally, `bbknn` v1.3.12 [75] was applied to integrate samples  
647 and control for sample specific batch effects.

648

649 Clusters were defined using the Leiden graph-based clustering algorithm v0.8.3 [76] on the  
650 nearest neighbours determined by `bbknn`. Clusters were generated across a range of  
651 resolutions from 0.5 to 5 to empirically determine the optimal clustering resolution. For each  
652 resolution considered, the data was divided into training (2/3 of cells) and test (1/3 of cells)  
653 sets and a single layer dense neural network fit to predict cluster identity from expression using  
654 `keras` v2.4.3. The cluster label of each cell was predicted and the Matthews correlation  
655 coefficient (MCC) calculated for each cluster [77]. The final cluster classifications were chosen  
656 to achieve a minimum MCC of  $> 0.75$  across all clusters, with a resolution of 3.25 selected to  
657 meet this criterion (Fig. S9). At this resolution, all clusters met the threshold except for cluster  
658 40, which exhibited  $\text{MCC} < 0.75$  at many resolutions so was excluded (Fig. S9). This  
659 adjustment yielded a total of 57 clusters.

660 Cell type annotation

661 To determine the cell type identity of the 57 clusters, marker genes for each cluster were  
662 identified using the Wilcoxon rank-sum test (`sc.tl.rank_genes_groups` with `method='wilcoxon'`)  
663 to compare the gene expression of each cell type to all other cell types and rank genes  
664 according to differences in expression. Highly discriminative marker genes with a Bonferroni-  
665 corrected p-value  $< 0.05$  were then used to label cell types through expert knowledge. To  
666 further visualise the annotated cell types, dimensionality reduction was undertaken using the  
667 uniform manifold approximation and projection (UMAP) algorithm, implemented within `scanpy`  
668 (`scanpy.tl.umap`) with default parameters, except for changing the minimum distance from 0.5  
669 to 1.0. Analysing all cells that passed QC, we identified eight major cell populations including  
670 epithelial cells (stem cells, enterocytes and secretory cells), immune cells (T and B cells,  
671 plasma B cells and Myeloid cells), and mesenchymal cells.

672

673 Within epithelial cells, we identified three distinct stem cell populations: *OLFM4*<sup>+</sup> stem cells,  
674 *OLFM4*<sup>+</sup> *LGR5*<sup>+</sup> stem cells, and proliferating *MKI67*<sup>+</sup> stem cells. Among enterocytes, we  
675 identified progenitor cells marked by *OLFM4* and *GPX2*, precursor cells expressing *KRT20*,  
676 and a range of enterocytes expressing *IFI27*. We further distinguished enterocytes along the  
677 crypt-villus axis (crypt, middle, top) based on signature genes such as *ALPI*, *APOA4*, and  
678 *APOC3* [22]. In the secretory cell lineage, we identified goblet cells (*CLCA1*, *FCGBP*, *MUC2*),  
679 including proliferating *MKI67*<sup>+</sup> and *BCAS1*<sup>+</sup> goblet cells, as well as goblet cells positioned along  
680 the crypt-villus axis, marked by *EGFR*, *KLF4*, *NT5E*, and *SLC17A5*. Additional cell types  
681 included enteroendocrine cells (*NTS*, *PYY*, *GCG*), enterochromaffin cells (*TPH1*, *CES1*), and  
682 tuft cells (*PLCG2*, *PTGS1*, *LRMP*). A summary of these markers and their expression across  
683 cell types is visualised in Fig. S1.

684  
685 Within immune cells we identified monocytes expressing *S100A8/9*, *SOD2*, and *CXCL9/10*,  
686 macrophages with positive expression of *ITGA4*, resident macrophage populations (*CD163*,  
687 *MAF*, *C1QA/B/C*), conventional dendritic cells type 1 cDC1 (*XCR1*, *BATF3*), a mix of  
688 plasmacytoid dendritic cells and conventional dendritic cells type 2 (pDC/cDC2) determined  
689 by (*IRF4*, *ZEB1*, *FLT3*) and mast cells (*MS4A2*, *TPSAB1*) (Fig. S1). Additionally, we identified  
690 thirteen distinct T cell populations, including *CD4*<sup>+</sup> and *CD8*<sup>+</sup> T cells, innate lymphoid cells  
691 (ILCs, marked by *IL1R1*, *ALDOC*, *LSTI*), and gamma-delta T cells (*TRGC1*, *TRDC*, *GZMA/B*).  
692 Within the *CD4*<sup>+</sup> T cell subset, we characterized naive T cells (*SELL*, *CCR7*), *LEF1*<sup>+</sup> and  
693 *PASK*<sup>+</sup> expressing *CD4*<sup>+</sup> T cells, regulatory T cells (Tregs, marked by *FOXP3*, *TIGIT*), and two  
694 populations of double-negative (*CD4*<sup>-</sup> *CD8*<sup>-</sup>) T cells, one of which shows elevated *MBLN1*  
695 expression. In the *CD8*<sup>+</sup> T cell subset, we identified two populations of tissue-resident *CD8*<sup>+</sup> T  
696 cells expressing *TRGC2*, as well as a distinct population of *GZMK*<sup>+</sup> expressing *CD8*<sup>+</sup> T cells  
697 (Fig. S1).

698 Among B cells, we identified *FAU* expressing B cells, activated B cells (*CKS1B*, *STMN1*),  
699 naive B cells (*IGHD/M*, *FCER2*), and germinal center/plasmablast B cells (*CD19*, *CD38*,  
700 *TCL1A*). Additionally, we observed a gradient of plasma cells with varying levels of *XBPI1* and  
701 *CD38* expression (Fig. S1).

702 Lastly, we identified three mesenchymal cell populations: fibroblasts (*COL1A1/2*, *COL3A1*),  
703 endothelial cells (*PECAM1*, *VWF*) expressing *ACKR1*, and pericytes (*PDGFRB*, *CSPG4*) (Fig.  
704 S1).

705 We did not detect a distinct group of neutrophil and eosinophil cells - as previously well  
706 documented, they are poorly represented due to the limited ability of the 10X scRNA-seq  
707 process to capture granulocytes [78].

708 Crypt-villus score

709 We positioned epithelial cells along the crypt-villus axis, identifying top-villus epithelial cells as  
710 well as enterocyte precursors/progenitors and goblet cells located at the crypt base. Stem  
711 cells and enterocytes were scored based on expression of genes such as *APOA4*, *APOC3*,  
712 *ALPI*, *PKIB*, *PMP22*, and *SLC28A2*, derived from spatial transcriptomics data that characterize  
713 crypt and villus intestinal cells [22]. Similarly, we applied signature genes *EGFR*, *KLF4*, *NT5E*,  
714 and *SLC17A5* to score secretory cells across the crypt-villus axis.

715

716 Automatic cell type annotation

717 To annotate cell types across all samples, we used Celltypist v1.6.2 [79] to train a classification  
718 model based on our identified clusters. This trained Celltypist model was then applied to  
719 assign cell type labels to all 343 scRNA-seq samples, following the initial processing steps  
720 detailed in the “Single-cell RNA-seq processing and quality control” section. Cells with a  
721 Celltypist confidence score below 0.5 were excluded from subsequent analyses.

722 Differential gene expression analysis

723 For each cell type, we tested for association of gene expression with CD disease status or  
724 inflammation severity (TI-SES-CD score) using MAST v1.14.0, a two-part, generalised linear  
725 model with a logistic regression component for the discrete process (i.e., a gene is expressed  
726 or not) and linear regression component for the continuous process (i.e., the expression level)  
727 [80]. For gene  $i$ , individual  $j$ , and cell  $k$ , let  $Z_{ki}$  indicate whether gene  $i$  is expressed in cell  $k$  and  
728  $Y_{ki}$  denote the  $\ln(\text{CP10K}+1)$  normalised gene expression. A two-part regression model was  
729 used to test for association:

730

731 
$$\text{logit}(\text{Pr}(Z_{ki} = 1 | X_k)) = X_k \beta_i + W_k \gamma_j \quad (1)$$

732 
$$\text{Pr}(Y_{ki} = y | Z_{ki} = 1) = N(X_k \beta_i + W_k \gamma_j, \sigma_i^2) \quad (2)$$

733

734 where  $X_k$  are the predictor variables for cell  $k$ ,  $W_k$  is the random effect design matrix of cell  $k$   
735 belonging to individual  $j$ ,  $\beta_i$  is the vector of fixed effect regression coefficients, and  $\gamma_j$  is the  
736 vector of random effects (i.e., the random complement to  $\beta_i$ ), normally distributed with mean  
737 zero and variance  $\sigma_{\gamma k}^2$ . In all DE comparisons, whether contrasting CD inflamed or uninflamed  
738 with healthy controls or examining association of gene expression to TI-SES-CD score - sex,  
739 age (binned into groups of five), cell mitochondrial percentage (technical covariate associated  
740 with cellular stress), and cell complexity i.e., the number of genes detected per cell [80], [14]

741 were included as fixed effect variables and individual as a random effect to control for  
742 pseudoreplication bias [81]. The Benjamini-Hochberg procedure [82] was used to control for  
743 multiple testing across all cell types, and p-values were obtained from the hurdle model,  
744 derived from the summed  $\chi^2$  null distributions of the discrete ( $Z_i$ ) and continuous ( $Y_i$ )  
745 components, as described in [80]. To increase the speed of each test, genes with an average  
746 CP10K of <1 in that cell type were removed prior to fitting models for each cell type.

#### 747 Gene set enrichment analysis

748 Gene set enrichment analyses were performed using GSEA v1.17.1 [83] with default  
749 parameters to identify pathways enriched among differentially expressed genes. Pathways  
750 were obtained from the reactome v76 gene pathway database [84] as part of the molecular  
751 signatures database (MSigDB) v7.4 [85]. Z-scores from the CD vs control differential gene  
752 expression hurdle model, were used as input for enrichment analyses.

753

#### 754 Prioritisation of IBD effector genes

755 Forty four genes likely to be perturbed in IBD were identified from within IBD-associated loci  
756 based on a several criteria, including but not limited to 1) presence of a coding mutation fine-  
757 mapped down to single variant resolution, 2) detailed and convincing functional follow-up work  
758 that established the causality of the gene or 3) the protein encoded by the gene plays a major  
759 role in a pathway that is targeted by an existing IBD therapy. Note, it is typically not  
760 straightforward to identify disease effector genes from within GWAS loci and this challenge  
761 remains a major focus for the field of complex disease genetics. While our list of 45 likely IBD  
762 effector genes is undoubtedly greatly enriched for true IBD effector genes, false-positives  
763 could still remain.

#### 764 Specifically expressed genes

765 We identified specifically expressed genes (SEGs) for each cell type using CELLEX v1.2.1  
766 package [48]. CELLEX calculates specifically expressed gene scores using four  
767 complementary approaches that include Gene Enrichment Score [86], Expression Proportion  
768 [87], Normalized Specificity Index [88] and Differential Expression T-statistic - the package  
769 produces a normalised mean of these four metrics which we used as our Specificity score.

#### 770 Heritability analysis

771 Heritability enrichment analysis was performed using the CELLECT v1.3.0 workflow [48]. This  
772 workflow deploys stratified LD score regression (S-LDSC) [7] to identify cell types with features  
773 that are enriched in genetic associations for a disease/trait of interest. CELLECT was run with

774 default parameters, which includes filtering out complex genetic regions such as the HLA locus  
775 prior to analysis. CELLECT requires summary statistics from a genetic association study and  
776 a set of gene scores (ranging between 0 and 1) for each gene that are to be tested for  
777 heritability enrichment. For genetic summary statistics of interest, we used CD and UC  
778 statistics from [3] and as negative controls, we used genetic summary statistics for height [49]  
779 and [50]. For the gene scores, we used cell type specific gene scores with Bonferroni  
780 correction to control for the total number of tests across all cell types.

#### 781 Data availability

782 Raw sequencing data files are available at the European Genome-phenome Archive  
783 (<https://ega-archive.org>), accession number: *Available after publication*. Processed data are  
784 available at zenodo (<https://zenodo.org>), accession number DOI:  
785 <https://zenodo.org/records/14276773> and through <https://www.ibdverse.info/>.

#### 786 Code availability

787 The code used for analyses within this study is available at GitHub repository (*Available after*  
788 *publication*).

789

790

791

792

793

794

795

796

797

798

799

800

801

802

803

804

805



## 806 **Supplementary Figures and Tables**

807 Fig. S1. Marker gene expression used to curate annotations within the terminal ileum atlas.

808 Fig. S2. Epithelial cell types represent the crypt-villus axis differentiation.

809 Fig. S3. Cell-type proportions across healthy and CD samples in the atlasing cohort.

810 Fig. S4. Concordance of gene specificities across discovery and replication datasets.

811 Fig. S5. Accuracy in re-annotating the atlas cohort.

812 Fig. S6. Differentially expressed genes between CD inflamed and healthy samples across all  
813 57 cell types.

814 Fig. S7. Dysregulated pathways in CD versus healthy epithelial cells.

815 Fig. S8. Myeloid cell types enriched for CD heritability are found predominantly in CD gut  
816 biopsies.

817 Fig. S9. Optimisation of cluster resolution for cell-type identification.

818

819 Table S1. Clinical information for the IBDverse samples.

820 Table S2. Manually curated list of marker genes for cell types in the atlasing cohort dataset.

821 Table S3. Demographics of healthy and disease samples across cohorts.

822 Table S4. Significantly differentially expressed genes within each of the identified 57 cell types  
823 in the auto-annotated discovery, replication and full cohort datasets.

824 Table S5. Correlation between gene-expression fold changes from differential gene  
825 expression tests between our discovery and replication cohorts.

826 Table S6. Dysregulated pathways in CD inflamed epithelial cells.

827

828

829

830

831

832

833

834

835

836

837

838

839

840

841

842

843

844

845

## 846 Bibliography

- 847 1 Jenkinson, P.W. *et al.* (2020) Temporal Trends in Surgical Resection Rates and Biologic  
848 Prescribing in Crohn's Disease: A Population-based Cohort Study. *J Crohns Colitis* 14,  
849 1241–1247
- 850 2 Tsai, L. *et al.* (2021) Contemporary Risk of Surgery in Patients With Ulcerative Colitis  
851 and Crohn's Disease: A Meta-Analysis of Population-Based Cohorts. *Clin.*  
852 *Gastroenterol. Hepatol.* 19, 2031-2045.e11
- 853 3 de Lange, K.M. *et al.* (2017) Genome-wide association study implicates immune  
854 activation of multiple integrin genes in inflammatory bowel disease. *Nat. Genet.* 49,  
855 256–261
- 856 4 Sazonovs, A. *et al.* (2022) Large-scale sequencing identifies multiple genes and rare  
857 variants associated with Crohn's disease susceptibility. *Nat. Genet.* 54, 1275–1283
- 858 5 Liu, Z. *et al.* (2023) Genetic architecture of the inflammatory bowel diseases across East  
859 Asian and European ancestries. *Nat. Genet.* 55, 796–806
- 860 6 Soskic, B. *et al.* (2019) Chromatin activity at GWAS loci identifies T cell states driving  
861 complex immune diseases. *Nat. Genet.* 51, 1486–1493
- 862 7 Finucane, H.K. *et al.* (2018) Heritability enrichment of specifically expressed genes  
863 identifies disease-relevant tissues and cell types. *Nat. Genet.* 50, 621–629
- 864 8 Bossini-Castillo, L. *et al.* (2022) Immune disease variants modulate gene expression in  
865 regulatory CD4+ T cells. *Cell Genomics* 2, None
- 866 9 Nasrallah, R. *et al.* (2020) A distal enhancer at risk locus 11q13.5 promotes suppression  
867 of colitis by Treg cells. *Nature* 583, 447–452
- 868 10 Fairfax, B.P. *et al.* (2014) Innate immune activity conditions the effect of regulatory  
869 variants upon monocyte gene expression. *Science* 343, 1246949
- 870 11 Kinchen, J. *et al.* (2018) Structural remodeling of the human colonic mesenchyme in  
871 inflammatory bowel disease. *Cell* 175, 372-386.e17
- 872 12 Corridoni, D. *et al.* (2020) Single-cell atlas of colonic CD8+ T cells in ulcerative colitis.  
873 *Nat. Med.* 26, 1480–1490
- 874 13 Parikh, K. *et al.* (2019) Colonic epithelial cell diversity in health and inflammatory bowel  
875 disease. *Nature* 567, 49–55
- 876 14 Smillie, C.S. *et al.* (2019) Intra- and Inter-cellular Rewiring of the Human Colon during  
877 Ulcerative Colitis. *Cell* 178, 714-730.e22
- 878 15 Elmentaite, R. *et al.* (2020) Single-Cell Sequencing of Developing Human Gut Reveals  
879 Transcriptional Links to Childhood Crohn's Disease. *Dev. Cell* 55, 771-783.e5
- 880 16 Oliver, A.J. *et al.* (2024) Single-cell integration reveals metaplasia in inflammatory gut  
881 diseases. *Nature* 635, 699–707
- 882 17 Kong, L. *et al.* (2023) The landscape of immune dysregulation in Crohn's disease  
883 revealed through single-cell transcriptomic profiling in the ileum and colon. *Immunity* 56,  
884 444-458.e5
- 885 18 Martin, J.C. *et al.* (2019) Single-Cell Analysis of Crohn's Disease Lesions Identifies a  
886 Pathogenic Cellular Module Associated with Resistance to Anti-TNF Therapy. *Cell* 178,  
887 1493-1508.e20
- 888 19 Jia, C. *et al.* (2017) Accounting for technical noise in differential expression analysis of  
889 single-cell RNA sequencing data. *Nucleic Acids Res.* 45, 10978–10988
- 890 20 Adam, M. *et al.* (2017) Psychrophilic proteases dramatically reduce single-cell RNA-seq  
891 artifacts: a molecular atlas of kidney development. *Development* 144, 3625–3632
- 892 21 Uniken Venema, W.T.C. *et al.* (2022) Gut mucosa dissociation protocols influence cell

- 893 type proportions and single-cell gene expression levels. *Sci. Rep.* 12, 9897
- 894 22 Moor, A.E. *et al.* (2018) Spatial Reconstruction of Single Enterocytes Uncovers Broad  
895 Zonation along the Intestinal Villus Axis. *Cell* 175, 1156-1167.e15
- 896 23 Garrido-Trigo, A. *et al.* (2023) Macrophage and neutrophil heterogeneity at single-cell  
897 spatial resolution in human inflammatory bowel disease. *Nat. Commun.* 14, 4506
- 898 24 Thomas, T. *et al.* (2024) A longitudinal single-cell atlas of anti-tumour necrosis factor  
899 treatment in inflammatory bowel disease. *Nat. Immunol.* DOI: 10.1038/s41590-024-  
900 01994-8
- 901 25 Stankey, C.T. *et al.* (2024) A disease-associated gene desert directs macrophage  
902 inflammation through ETS2. *Nature* 630, 447–456
- 903 26 Stegk, J.P. *et al.* (2009) Expression profiles of human 11beta-hydroxysteroid  
904 dehydrogenases type 1 and type 2 in inflammatory bowel diseases. *Mol. Cell.*  
905 *Endocrinol.* 301, 104–108
- 906 27 Noti, M. *et al.* (2010) TNF suppresses acute intestinal inflammation by inducing local  
907 glucocorticoid synthesis. *J. Exp. Med.* 207, 1057–1066
- 908 28 Gibson, G. (2022) Perspectives on rigor and reproducibility in single cell genomics.  
909 *PLoS Genet.* 18, e1010210
- 910 29 Squair, J.W. *et al.* (2021) Confronting false discoveries in single-cell differential  
911 expression. *Nat. Commun.* 12, 5692
- 912 30 Lähnemann, D. *et al.* (2020) Eleven grand challenges in single-cell data science.  
913 *Genome Biol.* 21, 31
- 914 31 Gobin, S.J. *et al.* (1999) Transactivation of classical and nonclassical HLA class I genes  
915 through the IFN-stimulated response element. *J. Immunol.* 163, 1428–1434
- 916 32 Abarca-Heidemann, K. *et al.* (2002) Regulation of the expression of mouse TAP-  
917 associated glycoprotein (tapasin) by cytokines. *Immunol. Lett.* 83, 197–207
- 918 33 Johnson, D.R. and Pober, J.S. (1990) Tumor necrosis factor and immune interferon  
919 synergistically increase transcription of HLA class I heavy- and light-chain genes in  
920 vascular endothelium. *Proc Natl Acad Sci USA* 87, 5183–5187
- 921 34 Maddipatla, S.C. *et al.* (2023) Assessing Cellular and Transcriptional Diversity of Ileal  
922 Mucosa Among Treatment-Naïve and Treated Crohn’s Disease. *Inflamm. Bowel Dis.*  
923 29, 274–285
- 924 35 Kanke, M. *et al.* (2022) Single-Cell Analysis Reveals Unexpected Cellular Changes and  
925 Transposon Expression Signatures in the Colonic Epithelium of Treatment-Naïve Adult  
926 Crohn’s Disease Patients. *Cell. Mol. Gastroenterol. Hepatol.* 13, 1717–1740
- 927 36 Li Yim, A.Y.F. *et al.* (2023) Single-cell characterization of peripheral blood mononuclear  
928 cells from Crohn’s disease patients on vedolizumab. *medRxiv* DOI:  
929 10.1101/2023.06.23.23291732
- 930 37 Mennillo, E. *et al.* (2024) Single-cell and spatial multi-omics highlight effects of anti-  
931 integrin therapy across cellular compartments in ulcerative colitis. *Nat. Commun.* 15,  
932 1493
- 933 38 Spiewak, T.A. and Patel, A. (2022) User’s guide to JAK inhibitors in inflammatory bowel  
934 disease. *Current Research in Pharmacology and Drug Discovery* 3, 100096
- 935 39 Coskun, M. *et al.* (2013) Involvement of JAK/STAT signaling in the pathogenesis of  
936 inflammatory bowel disease. *Pharmacol. Res.* 76, 1–8
- 937 40 Bolton, C. *et al.* (2022) An integrated taxonomy for monogenic inflammatory bowel  
938 disease. *Gastroenterology* 162, 859–876
- 939 41 Hu, M. *et al.* (2022) Fucosyltransferase 2: A genetic risk factor for intestinal diseases.  
940 *Front. Microbiol.* 13, 940196

- 941 42 McGovern, D.P.B. *et al.* (2010) Fucosyltransferase 2 (FUT2) non-secretor status is  
942 associated with Crohn's disease. *Hum. Mol. Genet.* 19, 3468–3476
- 943 43 Nayar, S. *et al.* (2021) A myeloid-stromal niche and gp130 rescue in NOD2-driven  
944 Crohn's disease. *Nature* 593, 275–281
- 945 44 Watanabe, T. *et al.* (2005) NOD2 regulation of Toll-like receptor responses and the  
946 pathogenesis of Crohn's disease. *Gut* 54, 1515–1518
- 947 45 Lesage, S. *et al.* (2002) CARD15/NOD2 mutational analysis and genotype-phenotype  
948 correlation in 612 patients with inflammatory bowel disease. *Am. J. Hum. Genet.* 70,  
949 845–857
- 950 46 Hegarty, L.M. *et al.* (2023) Macrophages in intestinal homeostasis and inflammatory  
951 bowel disease. *Nat. Rev. Gastroenterol. Hepatol.* 20, 538–553
- 952 47 West, N.R. *et al.* (2017) Oncostatin M drives intestinal inflammation and predicts  
953 response to tumor necrosis factor-neutralizing therapy in patients with inflammatory  
954 bowel disease. *Nat. Med.* 23, 579–589
- 955 48 Timshel, P.N. *et al.* (2020) Genetic mapping of etiologic brain cell types for obesity.  
956 *eLife* 9,
- 957 49 Yengo, L. *et al.* (2018) Meta-analysis of genome-wide association studies for height and  
958 body mass index in ~700000 individuals of European ancestry. *Hum. Mol. Genet.* 27,  
959 3641–3649
- 960 50 Lee, J.J. *et al.* (2018) Gene discovery and polygenic prediction from a genome-wide  
961 association study of educational attainment in 1.1 million individuals. *Nat. Genet.* 50,  
962 1112–1121
- 963 51 Dennison, T.W. *et al.* (2024) Patient-derived organoid biobank identifies epigenetic  
964 dysregulation of intestinal epithelial MHC-I as a novel mechanism in severe Crohn's  
965 Disease. *Gut* 73, 1464–1477
- 966 52 Hundorfean, G. *et al.* (2007) Luminal antigens access late endosomes of intestinal  
967 epithelial cells enriched in MHC I and MHC II molecules: in vivo study in Crohn's ileitis.  
968 *Am. J. Physiol. Gastrointest. Liver Physiol.* 293, G798-808
- 969 53 Linke, A. *et al.* (2022) Antigen Cross-Presentation by Murine Proximal Tubular Epithelial  
970 Cells Induces Cytotoxic and Inflammatory CD8+ T Cells. *Cells* 11,
- 971 54 Limmer, A. *et al.* (2000) Efficient presentation of exogenous antigen by liver endothelial  
972 cells to CD8+ T cells results in antigen-specific T-cell tolerance. *Nat. Med.* 6, 1348–1354
- 973 55 Malik, A. *et al.* (2023) Epithelial IFN $\gamma$  signalling and compartmentalized antigen  
974 presentation orchestrate gut immunity. *Nature* 623, 1044–1052
- 975 56 Na, Y.R. *et al.* (2019) Macrophages in intestinal inflammation and resolution: a potential  
976 therapeutic target in IBD. *Nat. Rev. Gastroenterol. Hepatol.* 16, 531–543
- 977 57 Bain, C.C. *et al.* (2013) Resident and pro-inflammatory macrophages in the colon  
978 represent alternative context-dependent fates of the same Ly6Chi monocyte precursors.  
979 *Mucosal Immunol.* 6, 498–510
- 980 58 Kamada, N. *et al.* (2008) Unique CD14 intestinal macrophages contribute to the  
981 pathogenesis of Crohn disease via IL-23/IFN-gamma axis. *J. Clin. Invest.* 118, 2269–  
982 2280
- 983 59 Thiesen, S. *et al.* (2014) CD14(hi)HLA-DR(dim) macrophages, with a resemblance to  
984 classical blood monocytes, dominate inflamed mucosa in Crohn's disease. *J. Leukoc.*  
985 *Biol.* 95, 531–541
- 986 60 Hedl, M. *et al.* (2016) JAK2 Disease-Risk Variants Are Gain of Function and JAK  
987 Signaling Threshold Determines Innate Receptor-Induced Proinflammatory Cytokine  
988 Secretion in Macrophages. *J. Immunol.* 197, 3695–3704

- 989 61 Park, C. *et al.* (2000) Immune response in Stat2 knockout mice. *Immunity* 13, 795–804
- 990 62 Desai, H.R. *et al.* (2017) Macrophage JAK2 deficiency protects against high-fat diet-  
991 induced inflammation. *Sci. Rep.* 7, 7653
- 992 63 Jagadeesh, K.A. *et al.* (2022) Identifying disease-critical cell types and cellular  
993 processes by integrating single-cell RNA-sequencing and human genetics. *Nat. Genet.*  
994 54, 1479–1492
- 995 64 Beaudoin, M. *et al.* (2013) Deep resequencing of GWAS loci identifies rare variants in  
996 CARD9, IL23R and RNF186 that are associated with ulcerative colitis. *PLoS Genet.* 9,  
997 e1003723
- 998 65 Franke, A. *et al.* (2010) Genome-wide meta-analysis increases to 71 the number of  
999 confirmed Crohn’s disease susceptibility loci. *Nat. Genet.* 42, 1118–1125
- 1000 66 UK IBD Genetics Consortium *et al.* (2009) Genome-wide association study of ulcerative  
1001 colitis identifies three new susceptibility loci, including the HNF4A region. *Nat. Genet.*  
1002 41, 1330–1334
- 1003 67 Fleming, S.J. *et al.* (2019) Unsupervised removal of systematic background noise from  
1004 droplet-based single-cell experiments using CellBender. *BioRxiv* DOI: 10.1101/791699
- 1005 68 Lun, A.T.L. *et al.* (2019) EmptyDrops: distinguishing cells from empty droplets in droplet-  
1006 based single-cell RNA sequencing data. *Genome Biol.* 20, 63
- 1007 69 Wolock, S.L. *et al.* (2019) Scrublet: Computational Identification of Cell Doublets in  
1008 Single-Cell Transcriptomic Data. *Cell Syst.* 8, 281-291.e9
- 1009 70 van der Walt, S. *et al.* (2014) scikit-image: image processing in Python. *PeerJ* 2, e453
- 1010 71 Luecken, M.D. and Theis, F.J. (2019) Current best practices in single-cell RNA-seq  
1011 analysis: a tutorial. *Mol. Syst. Biol.* 15, e8746
- 1012 72 Wolf, F.A. *et al.* (2018) SCANPY: large-scale single-cell gene expression data analysis.  
1013 *Genome Biol.* 19, 15
- 1014 73 Cattell, R.B. (1966) The scree test for the number of factors. *Multivariate Behav. Res.* 1,  
1015 245–276
- 1016 74 Satopaa, V. *et al.* (2011) , Finding a “kneedle” in a haystack: detecting knee points in  
1017 system behavior. , in *2011 31st International Conference on Distributed Computing*  
1018 *Systems Workshops*, pp. 166–171
- 1019 75 Polański, K. *et al.* (2020) BBKNN: fast batch alignment of single cell transcriptomes.  
1020 *Bioinformatics* 36, 964–965
- 1021 76 Traag, V.A. *et al.* (2019) From Louvain to Leiden: guaranteeing well-connected  
1022 communities. *Sci. Rep.* 9, 5233
- 1023 77 Chicco, D. and Jurman, G. (2020) The advantages of the Matthews correlation  
1024 coefficient (MCC) over F1 score and accuracy in binary classification evaluation. *BMC*  
1025 *Genomics* 21, 6
- 1026 78 Schelker, M. *et al.* (2017) Estimation of immune cell content in tumour tissue using  
1027 single-cell RNA-seq data. *Nat. Commun.* 8, 2032
- 1028 79 Domínguez Conde, C. *et al.* (2022) Cross-tissue immune cell analysis reveals tissue-  
1029 specific features in humans. *Science* 376, eabl5197
- 1030 80 Finak, G. *et al.* (2015) MAST: a flexible statistical framework for assessing  
1031 transcriptional changes and characterizing heterogeneity in single-cell RNA sequencing  
1032 data. *Genome Biol.* 16, 278
- 1033 81 Zimmerman, K.D. *et al.* (2021) A practical solution to pseudoreplication bias in single-  
1034 cell studies. *Nat. Commun.* 12, 738
- 1035 82 Benjamini, Y. and Hochberg, Y. (1995) Controlling the false discovery rate: A practical  
1036 and powerful approach to multiple testing. *Journal of the Royal Statistical Society.*

- 1037        *Series B (Methodological)* 57, 289–300
- 1038    83    Korotkevich, G. *et al.* (2016) Fast gene set enrichment analysis. *BioRxiv* DOI:  
1039        10.1101/060012
- 1040    84    Fabregat, A. *et al.* (2017) Reactome pathway analysis: a high-performance in-memory  
1041        approach. *BMC Bioinformatics* 18, 142
- 1042    85    Subramanian, A. *et al.* (2005) Gene set enrichment analysis: a knowledge-based  
1043        approach for interpreting genome-wide expression profiles. *Proc Natl Acad Sci USA*  
1044        102, 15545–15550
- 1045    86    Zeisel, A. *et al.* (2018) Molecular architecture of the mouse nervous system. *Cell* 174,  
1046        999-1014.e22
- 1047    87    Skene, N.G. *et al.* (2018) Genetic identification of brain cell types underlying  
1048        schizophrenia. *Nat. Genet.* 50, 825–833
- 1049    88    Dougherty, J.D. *et al.* (2010) Analytical approaches to RNA profiling data for the  
1050        identification of genes enriched in specific cells. *Nucleic Acids Res.* 38, 4218–4230

# Figures

**Fig. 1. Single-cell expression atlas of the terminal ileum in healthy controls and patients with Crohn's Disease.**

**(a) Experimental design and sample processing**

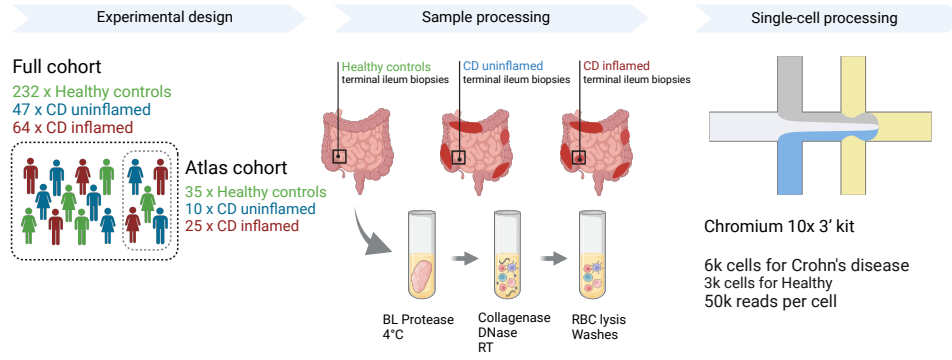

**(b) UMAP projection of cells from the Atlas cohort**

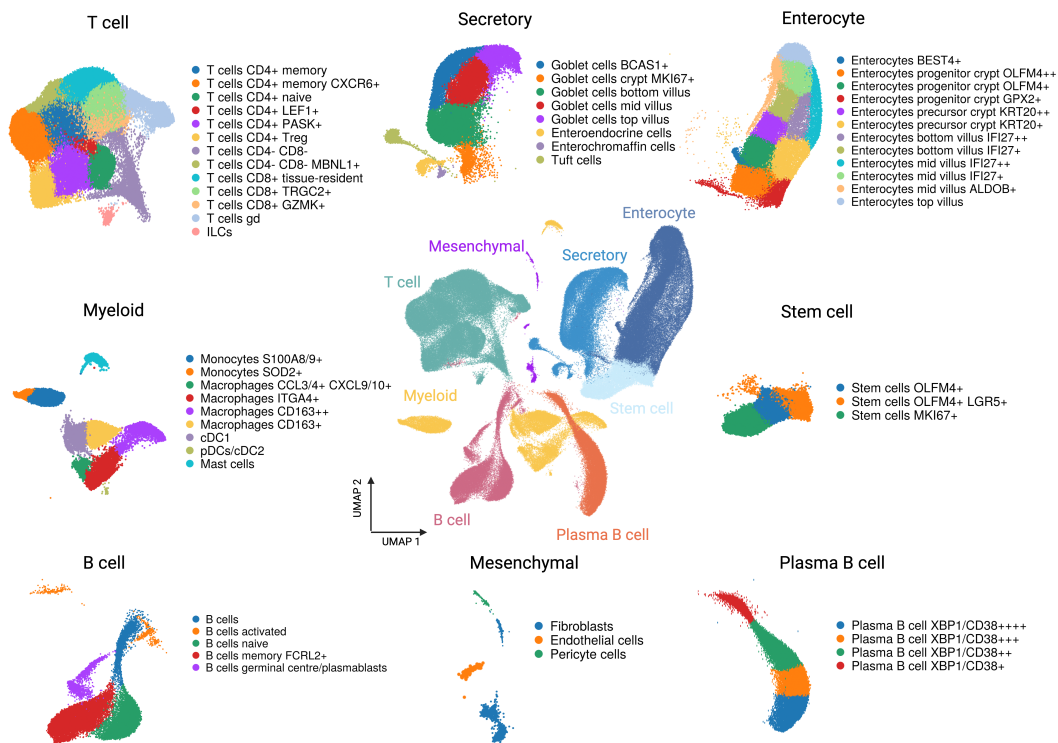

**(a)** Terminal ileum biopsies from 343 individuals were dissociated to single cells on ice in Hank's balanced salt solution (HBSS) containing Bacillus Licheniformis (BL) protease. This was followed by a brief incubation in collagenase and then red blood cell (RBC) lysis buffer. Single cell suspensions were then profiled with the Chromium 10X 3' kit (Methods). **(b)** Centre: Uniform Manifold Approximation and Projection (UMAP) of ~216k cells from the atlas cohort that meet quality control criteria (Methods), with eight colors representing the primary cell populations. Surrounding the central UMAP, these major populations are further subdivided into 57 distinct cell subtypes.

**Fig. 2. Replicable differential gene expression signatures in CD epithelial cells enriched for interferon signaling and MHC I antigen presentation.**

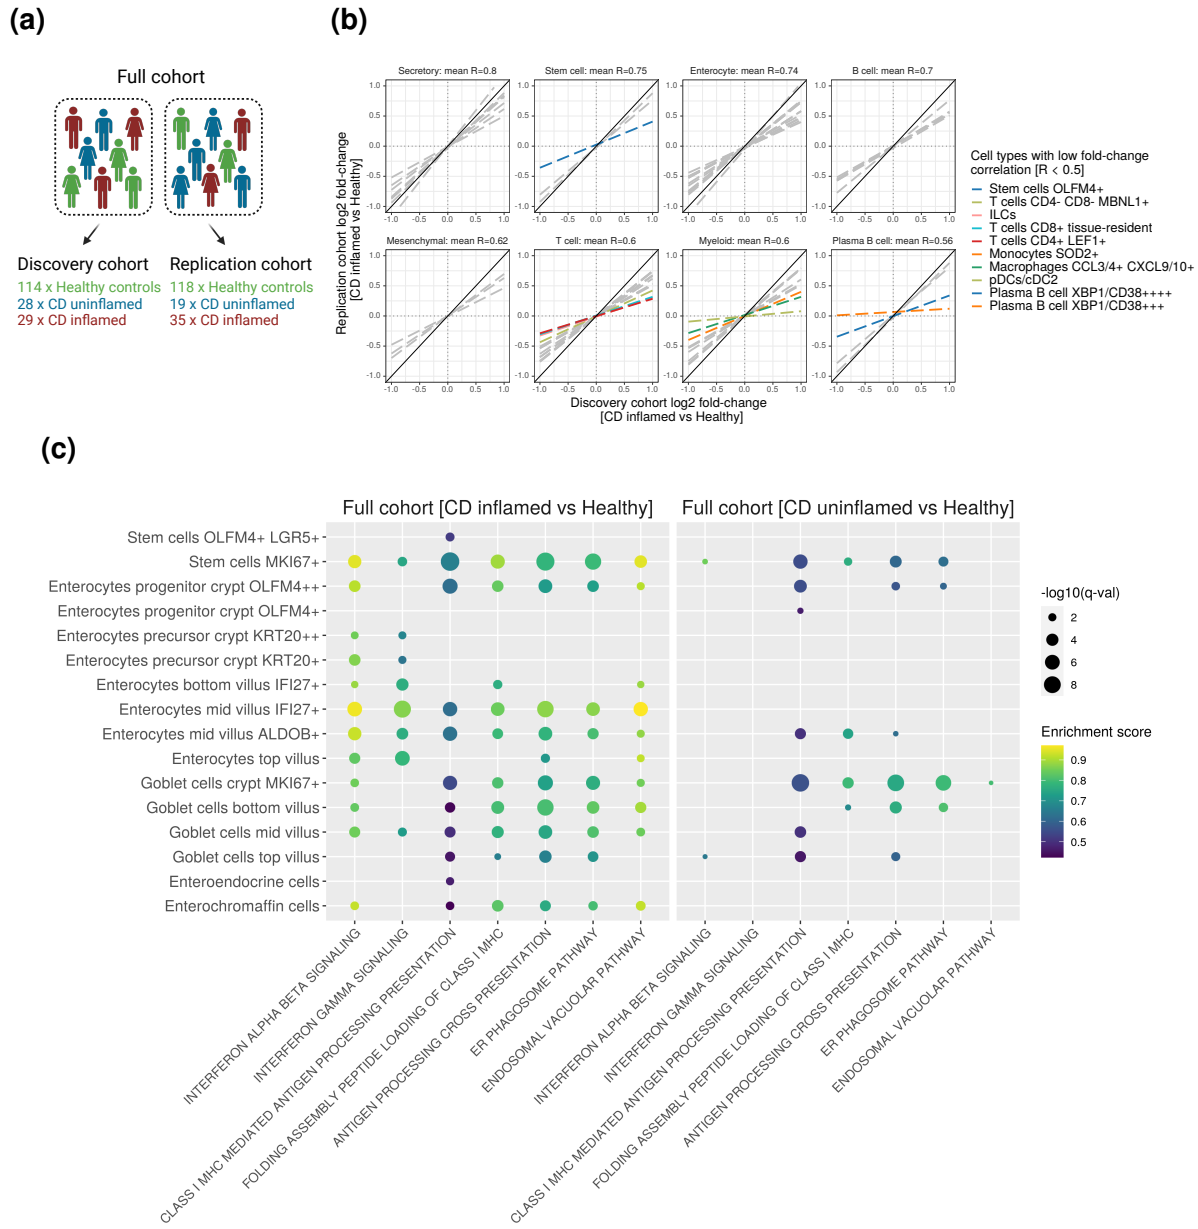

**(a)** Design of discovery and replication cohorts; i) first, 70 samples in the atlasing cohort were equally distributed at random between discovery and replication cohorts ii) the remaining 273 samples not included in the atlasing cohort were then randomly assigned to either cohort **(b)** Linear regression (dashed lines) between log<sub>2</sub> fold changes of differentially expressed genes (without thresholding, as outlined in Methods) in the discovery (x-axis) and replication (y-axis) datasets. The reported mean R represents the average of regression coefficients calculated across cell types within each major cell population. Highlighted cell types with low fold-change correlation ( $R < 0.5$ , Table S5) **(c)** Gene set enrichment analysis was performed on differential gene expression z-scores derived from the full cohort, comparing CD inflamed samples ( $n=64$ ) versus controls ( $n=232$ ) and CD uninflamed samples ( $n=47$ ) versus controls ( $n=232$ ). Results for epithelial cell types with high fold-change correlation ( $R \geq 0.5$ ).



**Fig. 3. *ITGA4*-positive macrophages upregulate cytokine and proteasome genes during inflammation.**

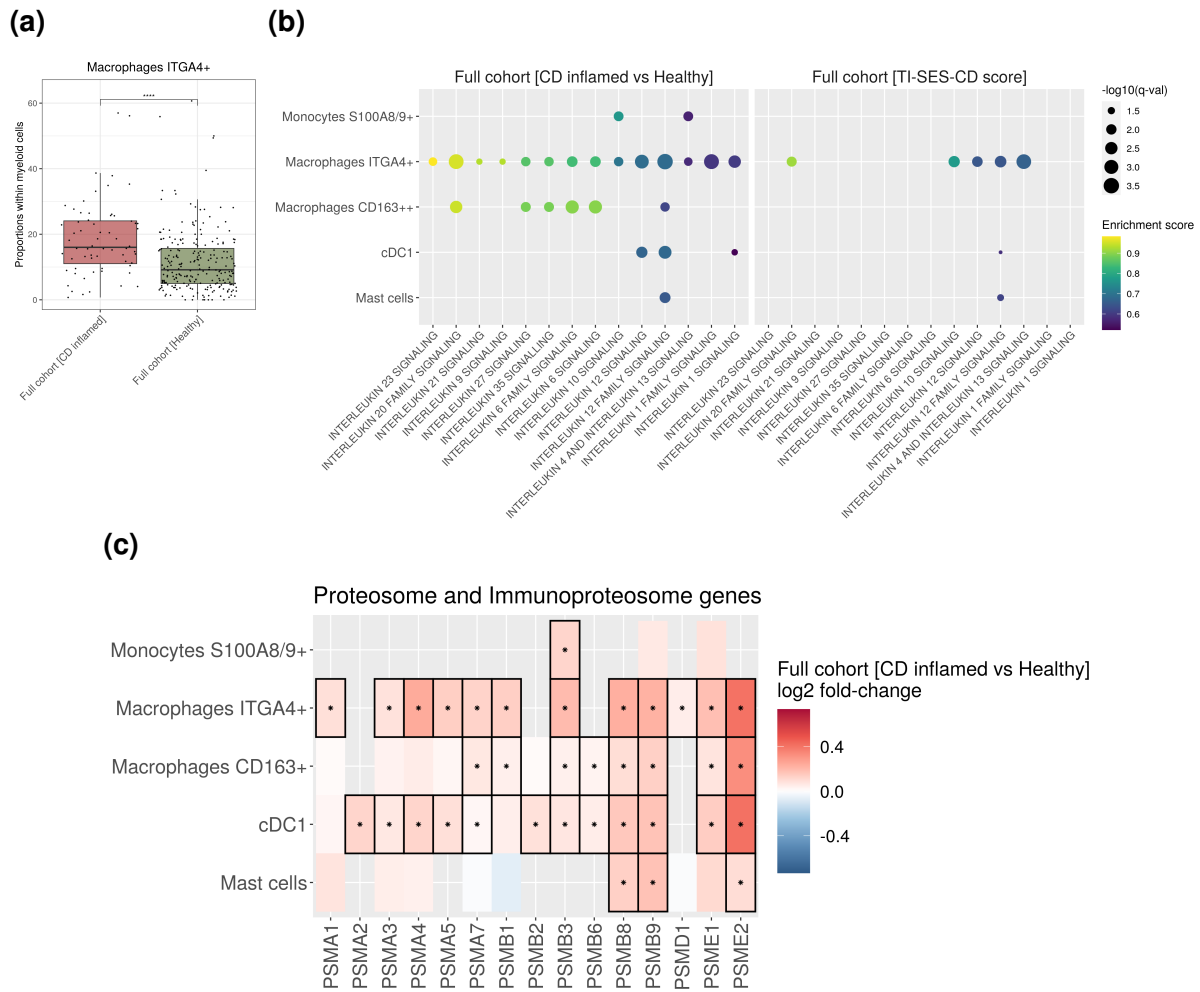

**(a)** Proportions of *ITGA4*-positive macrophages within myeloid cells across inflamed CD (n=64) and healthy samples (n=232) (adjusted p values \*\*\*\* < 0.0001, t-test). **(b)** Gene set enrichment analysis of differential gene expression between inflamed CD (n=64) and healthy samples (n=232) and across CD samples with varying severity of inflammation (n=111) - CD samples were stratified based on the simple endoscopic score applied to the terminal ileal segment (TI-SES-CD), with scores ranging from 0 to 9. Enrichment shown for replicable myeloid cell types ( $R \geq 0.5$ , Table S5) **(c)** Fold change and significance of proteasome and immunoproteasome genes differentially expressed in the replicable myeloid cell populations.

**Fig. 4. IBD risk genes show lineage-specific expression across terminal ileum cell types.**

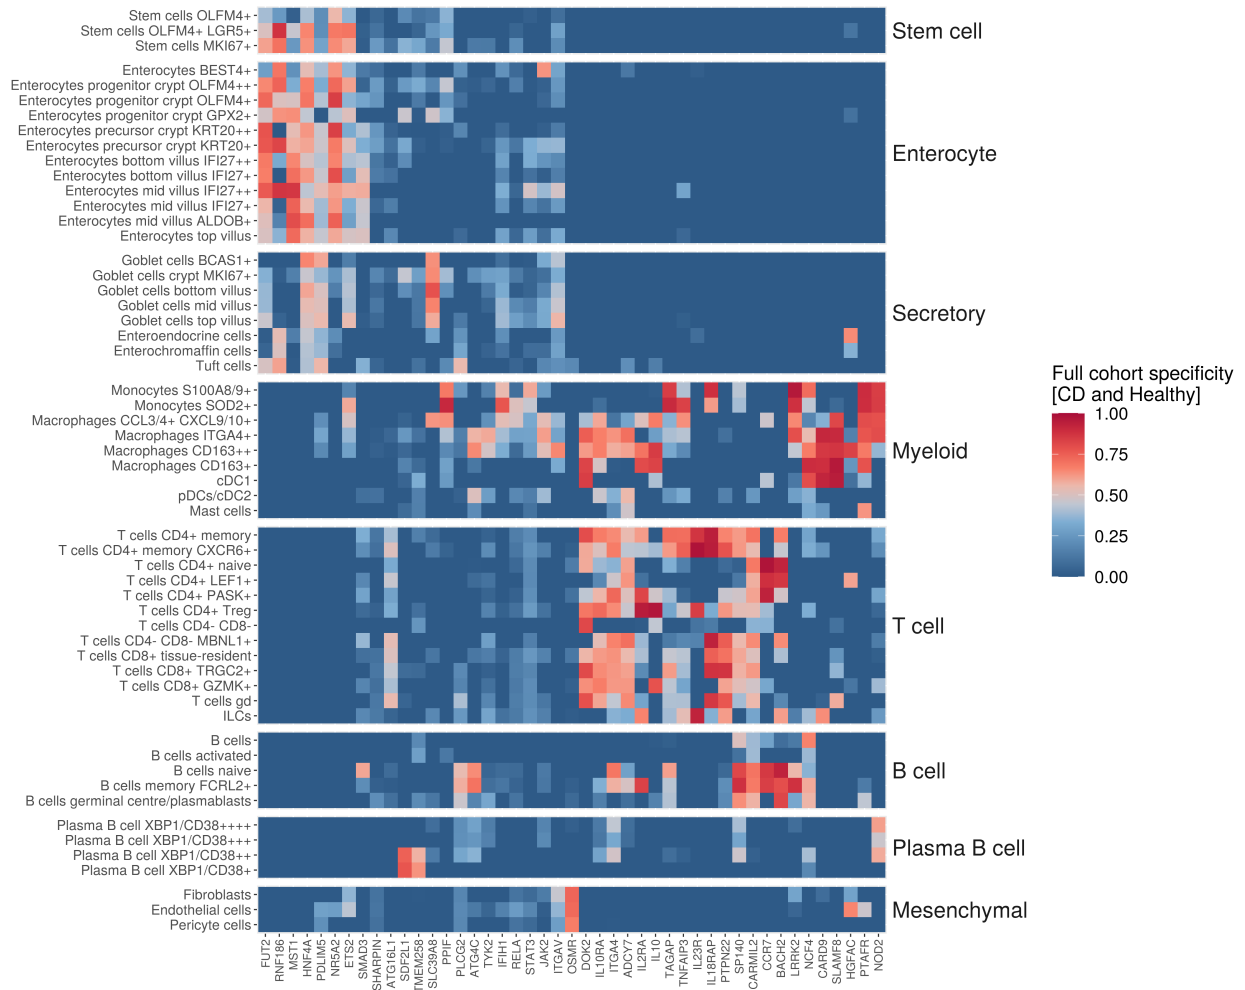

Specificity of IBD risk gene expression across 57 terminal ileum cell-types in the full cohort (n=343). For prioritisation criteria, see Methods.

**Fig. 5. Myeloid and T cells are enriched for CD and UC heritability.**

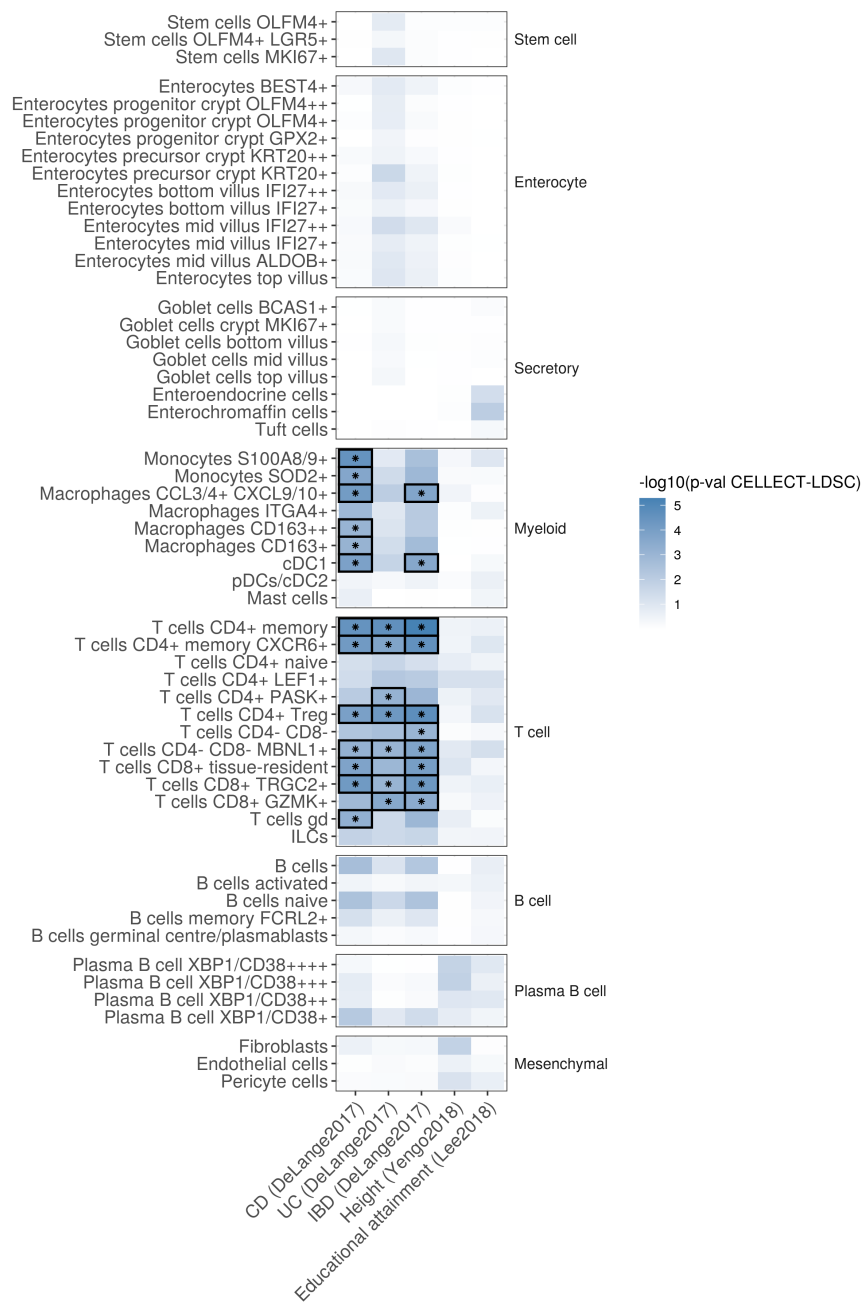

Significance of CD, UC and IBD heritability (p-values derived from Stratified LD Score Regression (LDSC)) applied to specifically expressed genes of each cell-type. Results were considered significant at a family-wise error rate FWER < 0.05. Height and educational attainment were used as negative controls.

## Tables

**Table 1. Demographics of healthy and CD patients in the IBDverse.**

|                | Healthy (%)   | Crohn's Disease (%) | P-value |
|----------------|---------------|---------------------|---------|
| N              | 232           | 111                 |         |
| Inflamed       | 0 (0.0)       | 64 (57.7)           | <0.001  |
| TI-SES-CD      |               |                     |         |
| [0 – 3)        | 232 (100.0)   | 47 (42.3)           |         |
| [3 – 6)        | 0 (0.0)       | 50 (45.0)           |         |
| [6 – 9)        | 0 (0.0)       | 14 (12.6)           |         |
| Sex = M        | 118 (50.9)    | 48 (43.2)           | 0.205   |
| Smoking Status |               |                     | 0.208   |
| No             | 178 (76.7)    | 77 (69.4)           |         |
| Yes            | 25 (10.8)     | 21 (18.9)           |         |
| Ex-Smoker      | 25 (10.8)     | 12 (10.8)           |         |
| Vape Smoker    | 4 (1.7)       | 1 (0.9)             |         |
| Mean Age (SD)  | 49.27 (13.31) | 40.87 (12.12)       | <0.001  |

Absolute number and proportions of demographics across IBDverse. Inflammation was determined based on TI endoscopic score for CD (TI-SES-CD), an aggregated score quantifying the degree of inflammation at several points in the TI. The values of the TI-SES-CD range from 0 to 9 (9 indicating the most severe inflammation). Patients were stratified into two groups: inflamed TI-SES-CD  $\geq 3$  and uninfamed TI-SES-CD  $< 3$ . A significant difference in mean age was observed between healthy controls and CD patients ( $p < 0.001$ , t-test). SD=standard deviation.
