# Supplementary material for: Single-Cell RNA Sequencing of Terminal Ileal Biopsies Identifies Signatures of Crohn’s Disease Pathogenesis
Source: bioRxiv or medRxiv preprint supplement (doi:10.1101/2023.09.06.23295056), 2024-12-20
Supplement: Supplementary file [file media-1.pdf]

**Fig. S2. Epithelial cell types represent the crypt-villus axis differentiation.**

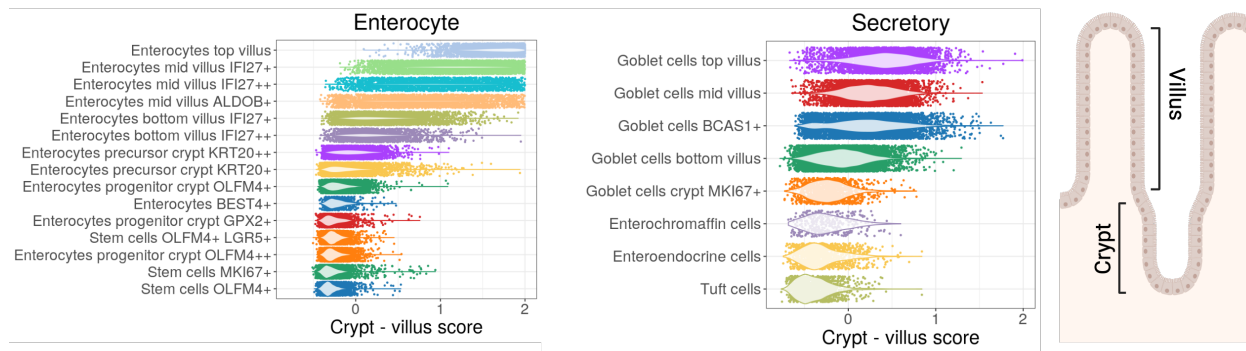

Spatial distribution of enterocytes and secretory cells along the crypt-villus axis was inferred using gene signatures from Moor et al. (2018) (Methods). A subset of enterocytes, termed “top villus enterocytes,” exhibited elevated expression scores for a specific gene signature (including *APOA4*, *APOC3*, *ALPI*), indicative of cells located at the villus tip. In contrast, enterocytes situated along the mid-villus or in progenitor/stem cell zones showed lower expression of these markers. Similarly, goblet cells were evaluated for a top-villus gene signature comprising *EGFR*, *KLF4* and *NT5E*. Top villus goblet cells demonstrated slightly higher expression scores compared to goblet cells in mid-villus regions and those at the crypt base.

**Fig. S3. Cell-type proportions across healthy and CD samples in the atlasing cohort.**

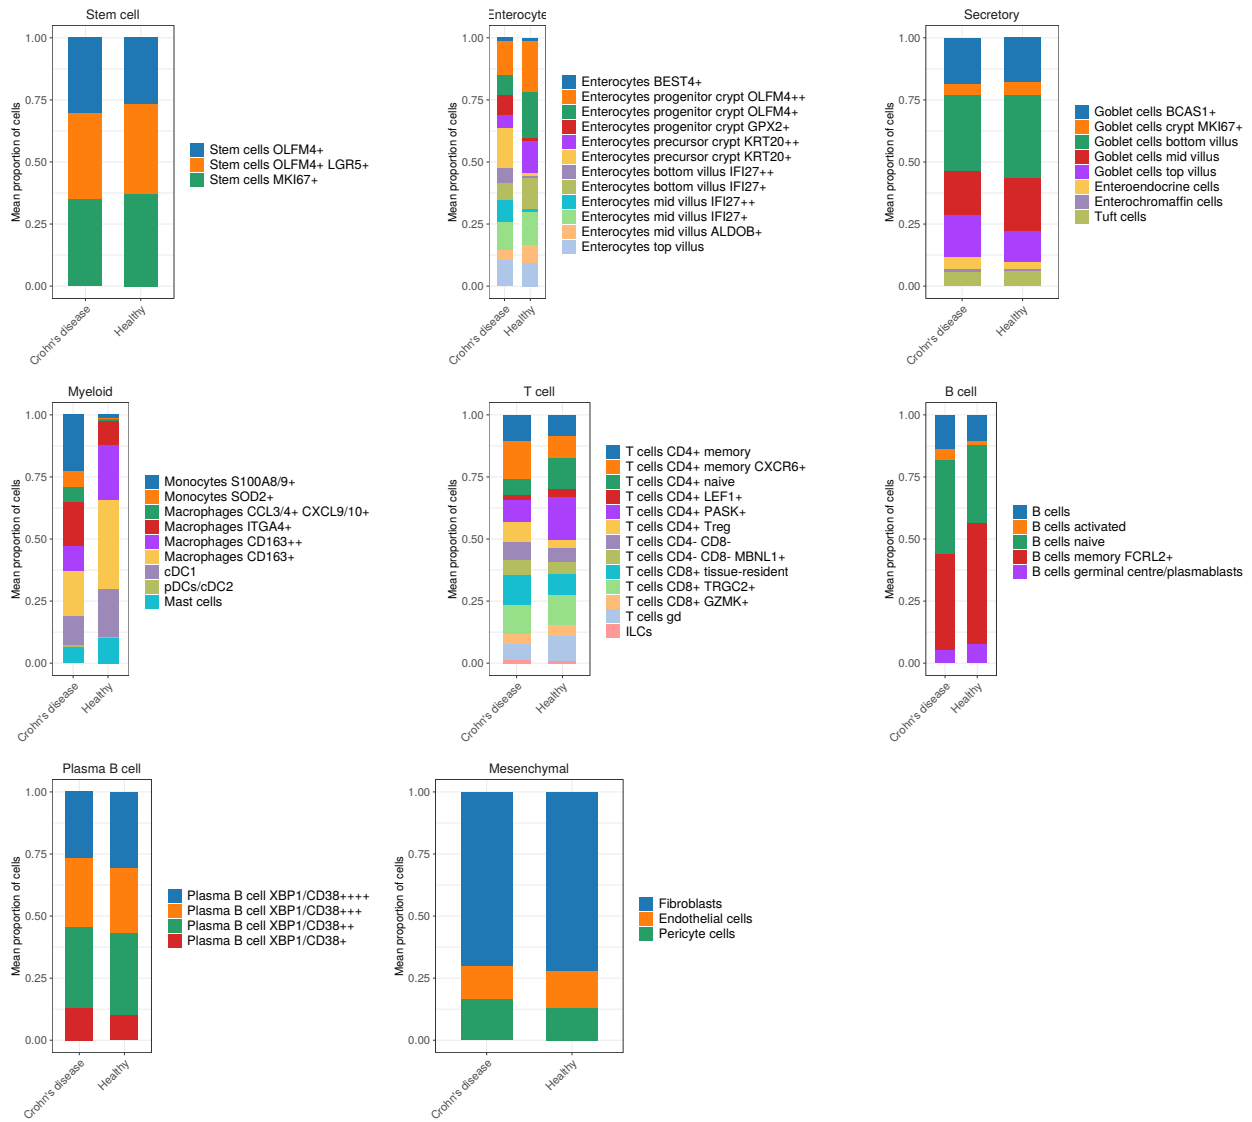

Compositional differences in cell-type proportions between CD patients (n=25) and healthy controls (n=35) across eight major cell populations.

**Fig. S4. Concordance of gene specificities across discovery and replication datasets.**

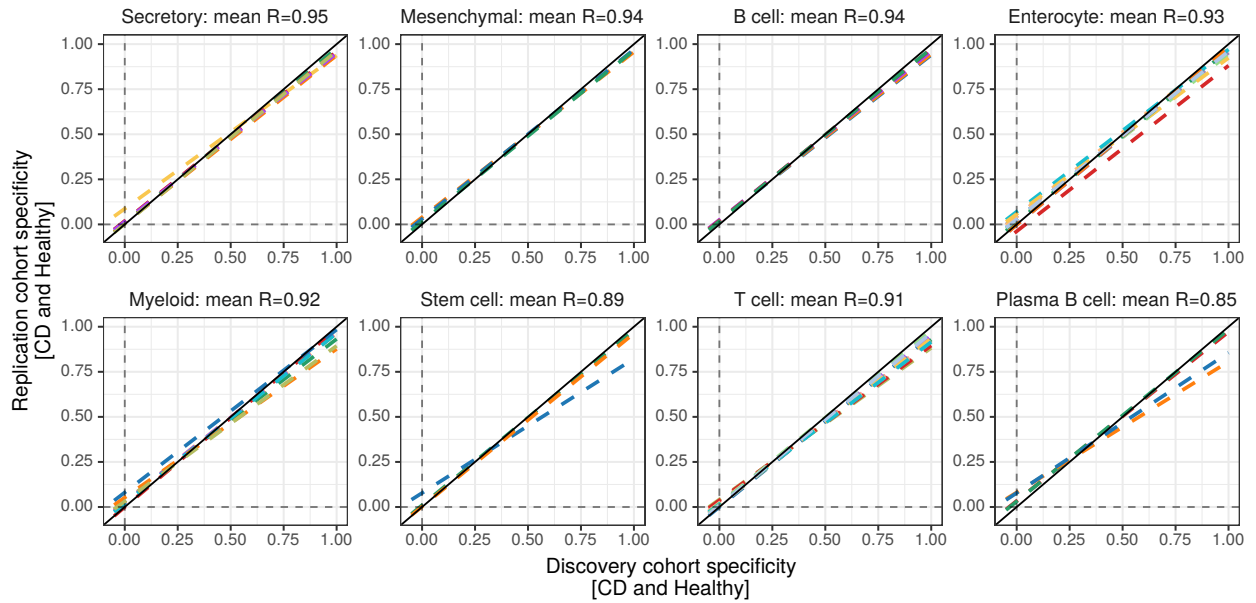

Linear regression model between computationally determined, specifically expressed genes (without thresholding, as outlined in Methods) in the discovery dataset (n=171, x-axis) and replication dataset (n=172, y-axis). For the color legend, please refer to Fig. 1b. The reported mean R represents the average of regression coefficients calculated across cell types within each major cell population.

**Fig. S5. Accuracy in re-annotating the atlas cohort.**

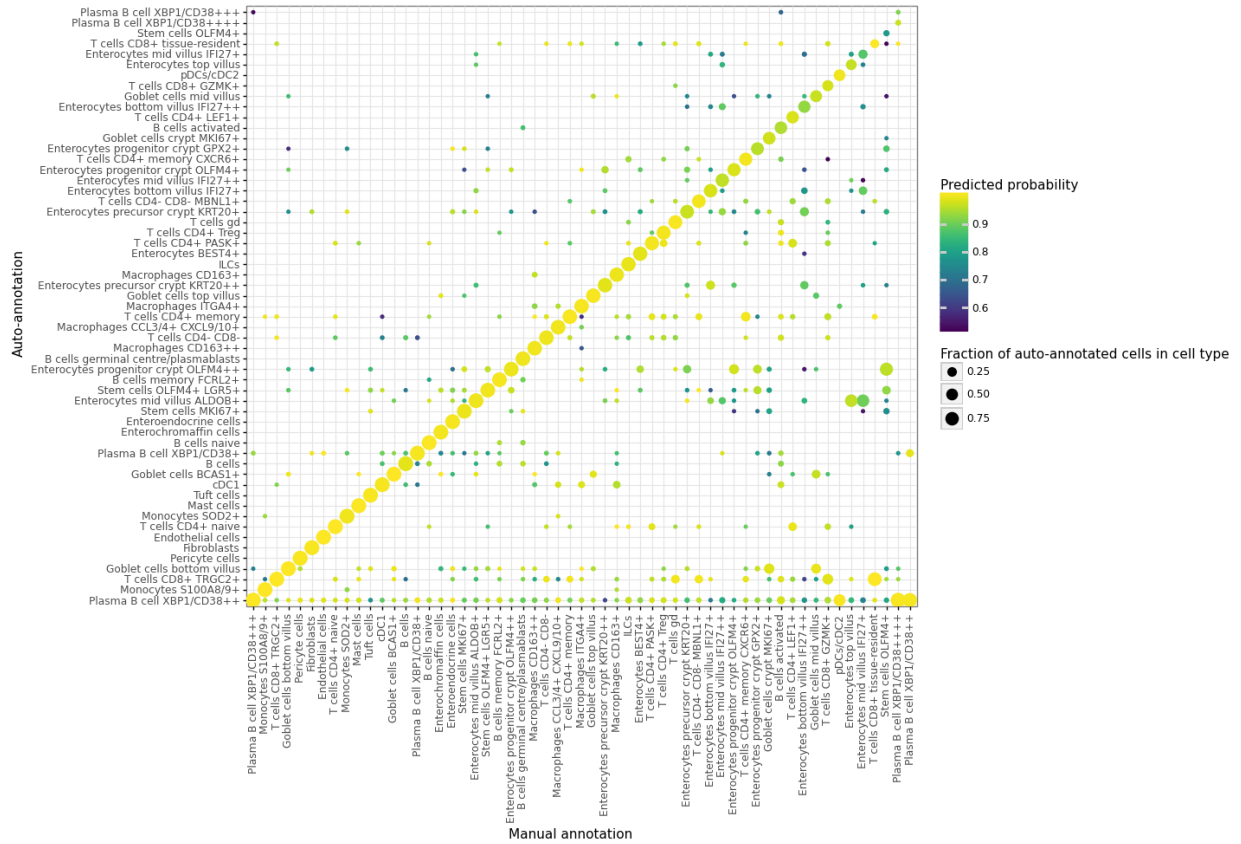

Dot size represents the proportion of auto-annotated cells in the atlas cohort (n=70, y-axis) within each manually defined cluster (x-axis), with color indicating the probability of the mapping prediction.

**Fig. S6. Differentially expressed genes between CD inflamed and healthy samples across all 57 cell types.**

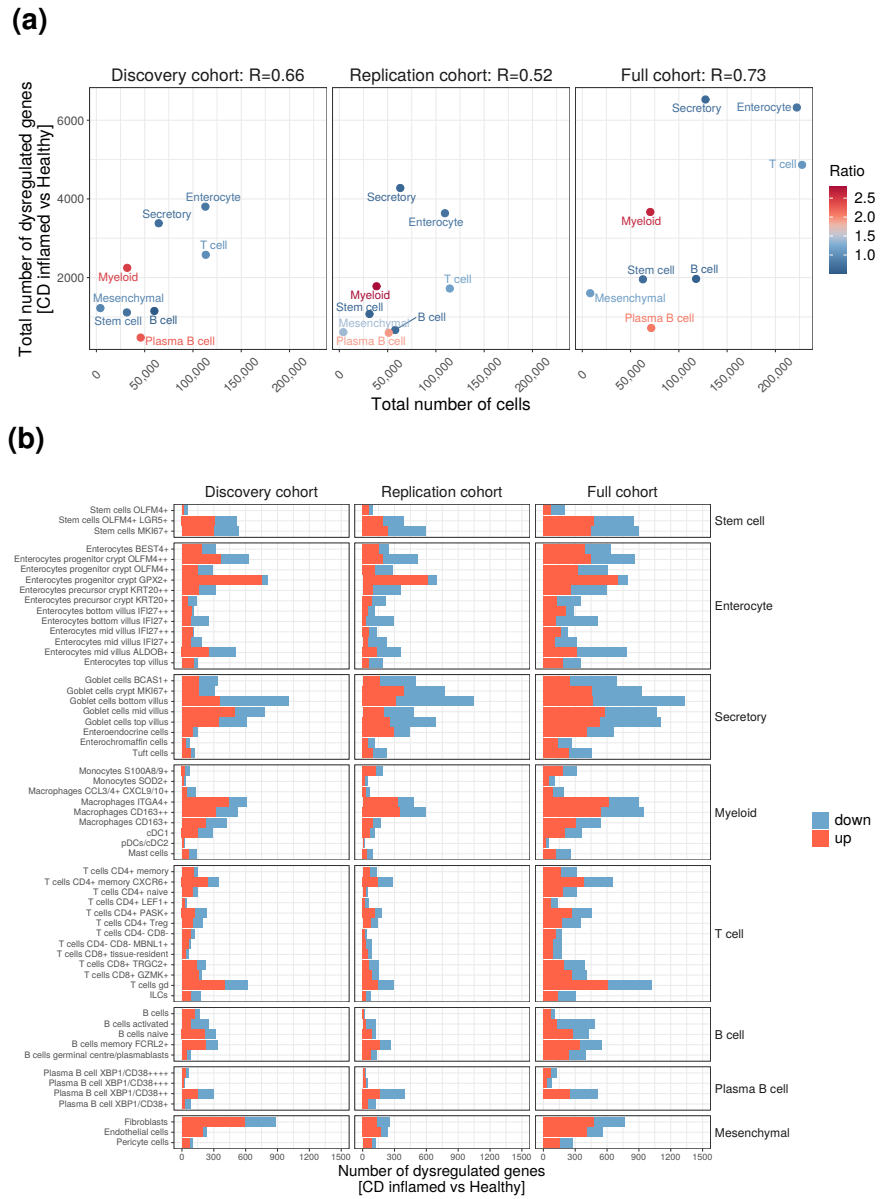

**(a)** The total number of cells in each major cell population (x-axis), the total number of significantly dysregulated genes (FDR < 5%), and the ratio of cells in CD versus healthy controls (color-coded) across the discovery, replication, and full cohorts. Pearson correlation coefficients (R) were calculated for all major cell populations. **(b)** The number of significantly up- and down-regulated genes (FDR < 5%) is shown on the x-axis for each of the 57 cell types (y-axis) across the discovery, replication, and full cohorts.

**Fig. S7. Dysregulated pathways in CD versus healthy epithelial cells.**

**(a) MHC-I antigen presentation**

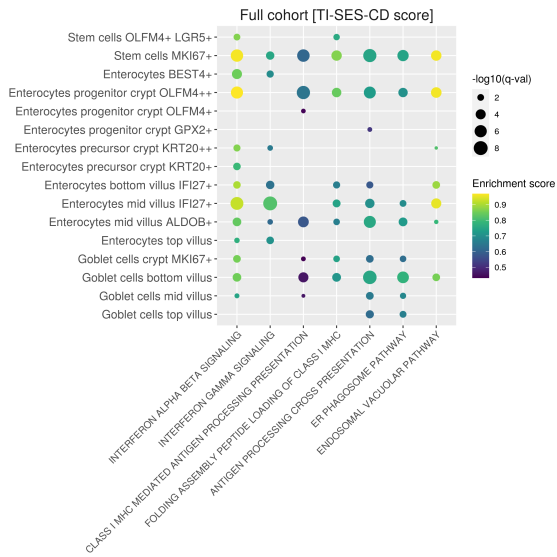

**(b) MHC-I vs MHC-II antigen presentation**

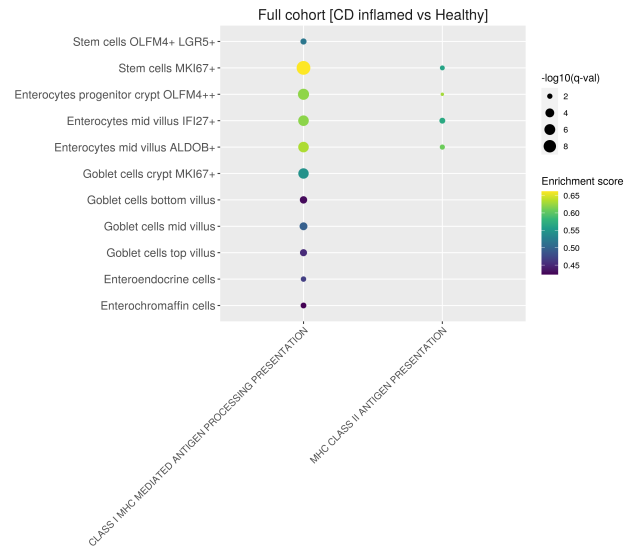

**(c) Metabolic pathways**

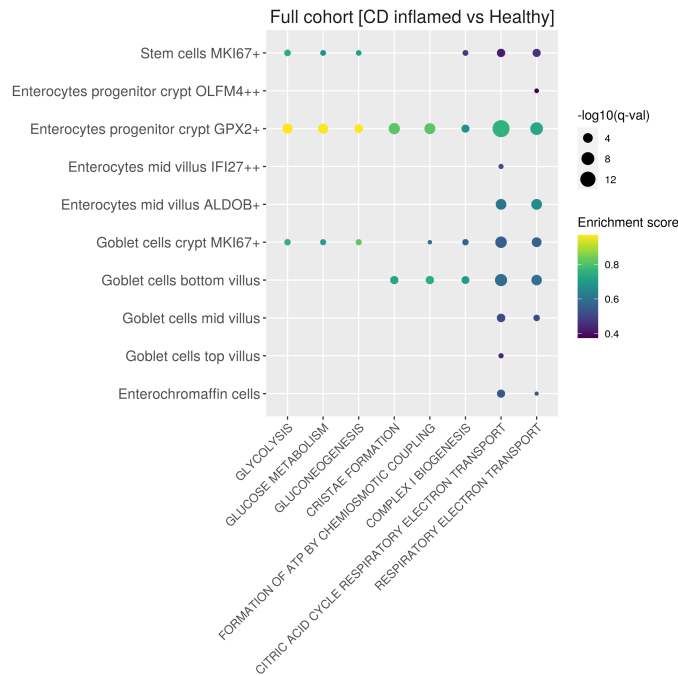

Gene set enrichment analysis was conducted on z-scores derived from the differential gene expression hurdle model applied to the full cohort. The results reveal upregulated pathways in CD epithelial cells, including **(a)** those associated with the TI-SES-CD score, **(b)** enrichment of MHC class II antigen presentation compared to MHC class I, and **(c)** significant metabolic changes within epithelial cells. Populations exhibiting low fold-change replicability ( $R < 0.5$ , Table S5) were excluded from this analysis.

**Fig. S8. Myeloid cell types enriched for CD heritability are found predominantly in CD gut biopsies.**

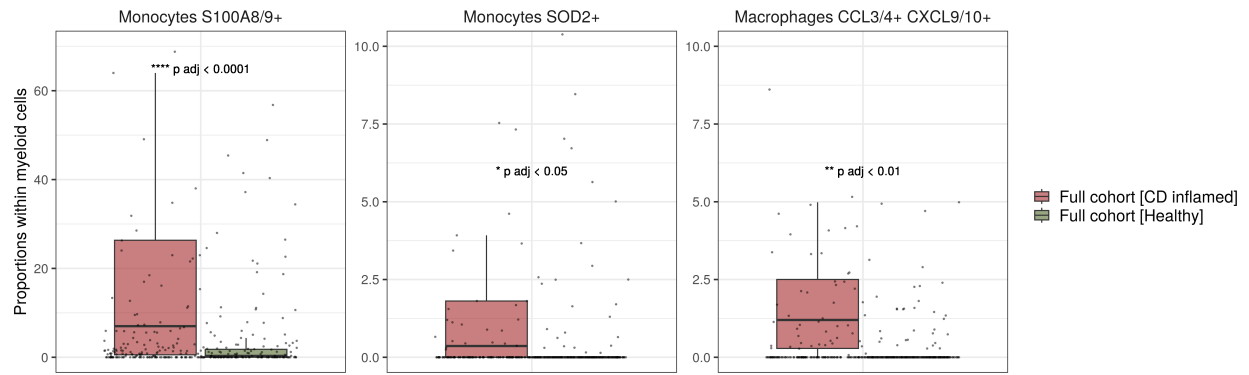

Boxplots show statistical significance (t-test) in the proportions of *S100A8/9+* and *SOD2+* monocytes and *CCL3/4+ CXCL9/10+* macrophages within myeloid cells, comparing inflamed CD and healthy samples.



**Fig. S9. Optimisation of cluster resolution for cell-type identification.**

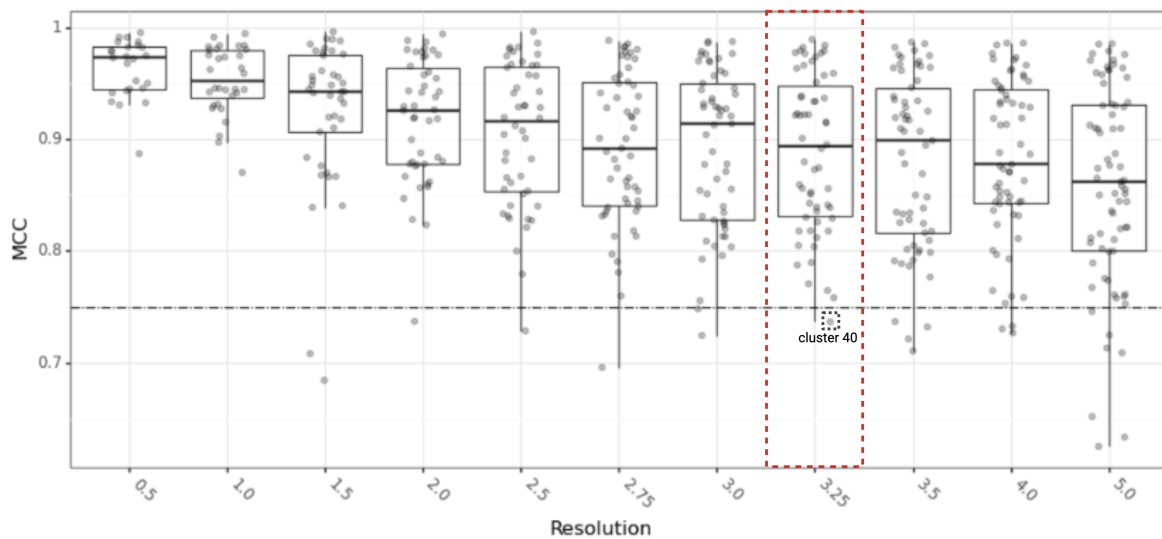

Cluster predictability (x-axis) across a range of clustering resolutions (y-axis). Cluster predictability was assessed by training a keras model on 2/3 of data and calculating the matthews correlation coefficient (MCC) in the remaining 1/3 test set (Methods). A resolution of 3.25 was selected, as cluster predictability rapidly declined at resolutions greater than 3.25. At this resolution, all clusters met the MCC threshold of  $> 0.75$ , with the exception of cluster 40, which exhibited an  $MCC < 0.75$  at multiple resolutions and was therefore excluded.

## Supplementary Tables

**Table S3. Demographics of healthy and disease samples across cohorts.**

|                                  | Discovery (%) | Replication (%) | P-value |
|----------------------------------|---------------|-----------------|---------|
| N                                | 171           | 172             |         |
| Disease status = Crohn's Disease | 57 (33.3)     | 54 (31.4)       | 0.730   |
| Inflamed                         | 29 (17.0)     | 35 (20.3)       | 0.489   |
| Sex = M                          | 82 (48.0)     | 84 (48.8)       | 0.914   |
| Mean age (SD)                    | 46.62 (14.05) | 46.49 (12.98)   | 0.928   |

Absolute number and proportions of demographics across discovery and replication cohorts. Non-significant differences determined by Fisher's exact test or t-test (for age). SD=standard deviation.
