# Supplementary material for: Single-Cell RNA Sequencing of Terminal Ileal Biopsies Identifies Signatures of Crohn’s Disease Pathogenesis
Source: bioRxiv or medRxiv preprint supplement (doi:10.1101/2023.09.06.23295056), 2024-12-20
Supplement: Supplementary file [file media-2.pdf]

## Supplementary Figures

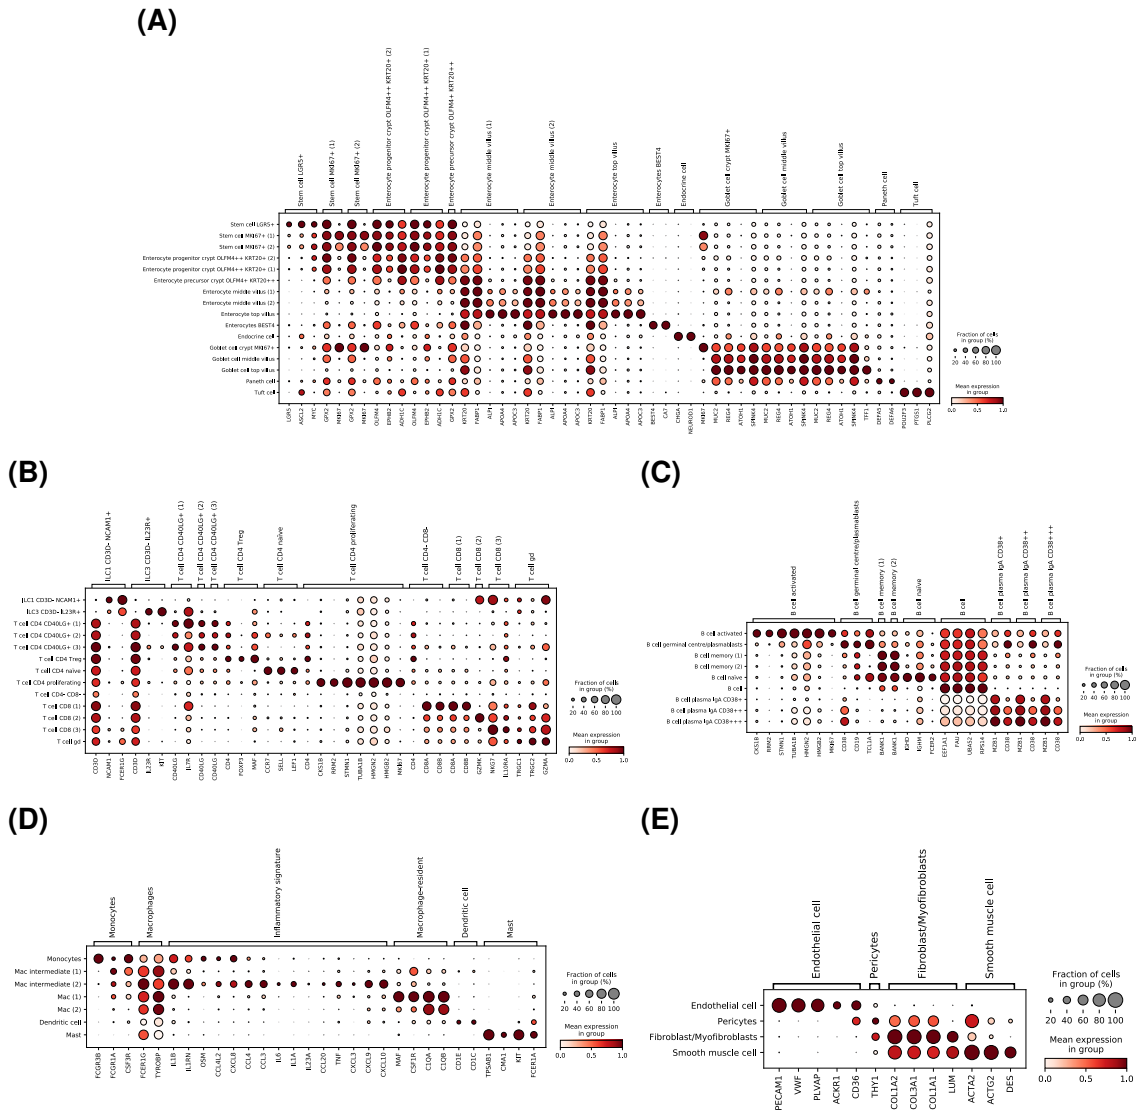

**(F) Specifically expressed genes are robust across discovery and replication cohorts.**

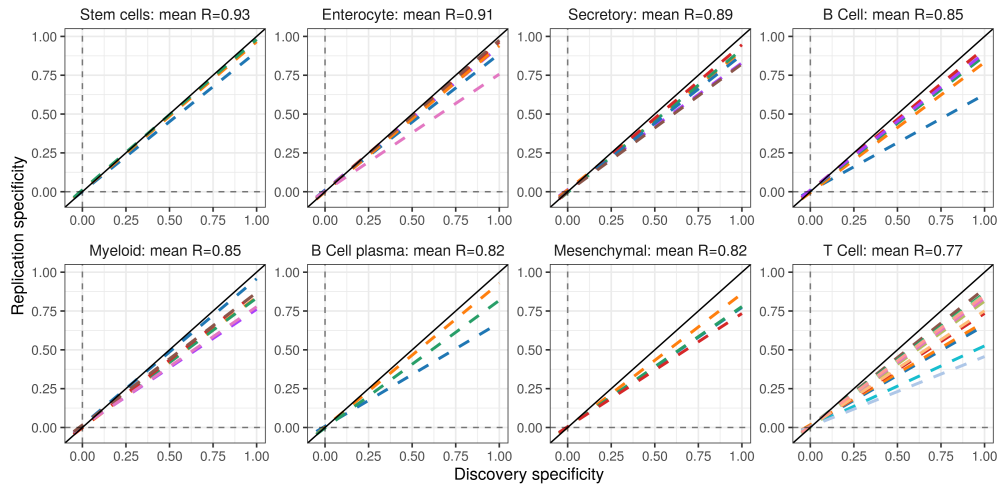

**Figure S1**

**Figure S1. Marker gene expression used to curate terminal ileum atlas cluster annotations.**

(A-E) Transcriptional signatures of literature or expert-curated markers that distinguish epithelial, T cell, B cell, myeloid and mesenchymal cell types. Dot size is proportional to the percentage of cells expressing a given marker within a cluster and the colour intensity denotes average gene expression within the cluster. (F) For each of the 49 cell types we fitted linear regression model between computationally-determined specifically expressed genes (no thresholds applied, Methods) in the discovery (x axis) and replication (y axis) datasets. For colour legend see Figure 1B.

**(A) Enterocyte and secretory cells scored for crypt-villus signature genes.**

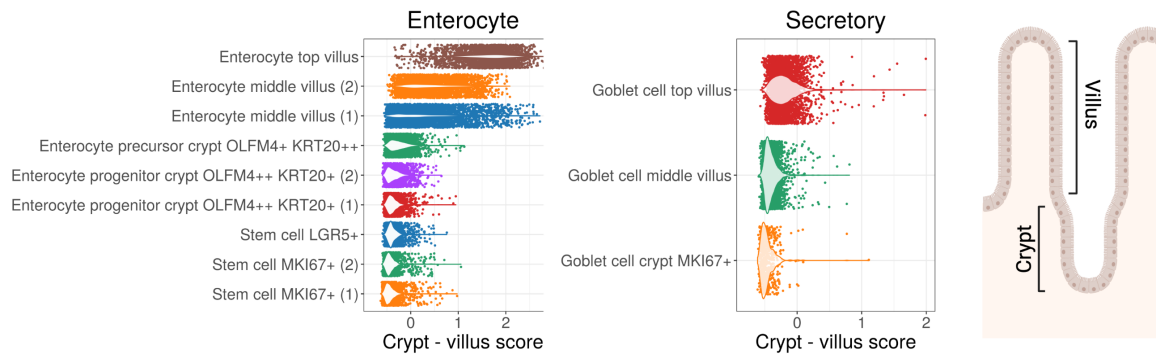

**(B) Developmental trajectories of the epithelial cell types.**

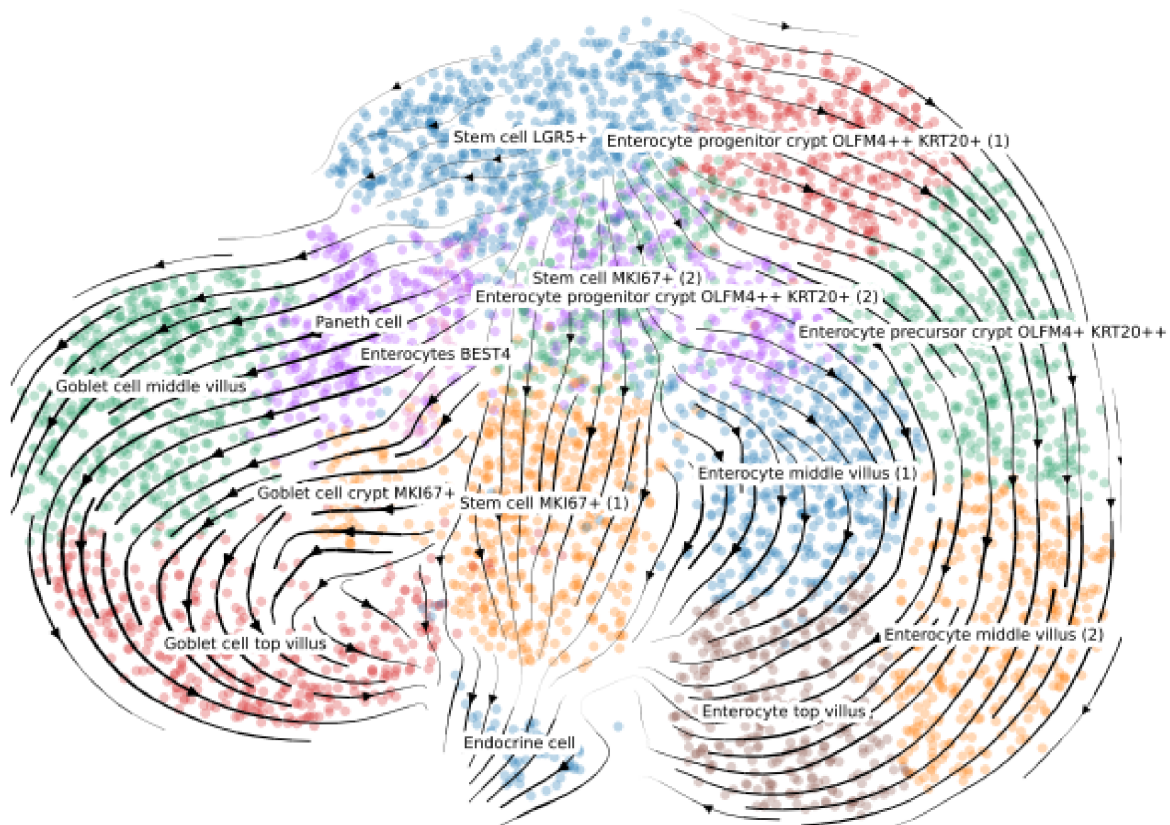

**Figure S2**



**Figure S2. Epithelial cell types represent the crypt-villus axis differentiation.**

(A) We identified multiple subtypes of enterocytes and goblet cells. To distinguish between them, we used two gene signatures from (Moor et al. 2018) to position epithelial and goblet cells along the crypt-villus axis. A subpopulation of enterocytes, that we defined as "enterocyte top villus" showed higher score (higher gene expression) for the gene signature (including *APOA4*, *APOC3*, *ALPI* genes), which defines cells at the tip of the intestinal villi. Enterocyte middle villus cells, progenitors or stem cells presented a lower expression of those genes. Similarly, we scored goblet cells for top-villus gene signature including *EGFR*, *KLF4* and *NT5E* genes. Goblet top villus cells presented slightly higher score than goblet middle villus cells and goblet cells at the crypt base. Non crypt-villus migrating cells such as tuft, paneth and endocrine cells, were excluded from the plot. (B) To infer the transition of epithelial cells from the bottom crypt to the top villus we used RNA velocity analysis (Methods) on all epithelial cell types except tuft cells. The figure shows UMAP of epithelial cells from discovery terminal ileum atlas (both Crohn's disease and healthy individuals) with arrows representing estimated velocity vectors i.e. transitions between cell states. We observed two main lineages of cells that arised from stem cells and transitioned into absorptive enterocytes (enterocyte top villus) and secretory cells (goblet cell top villus)

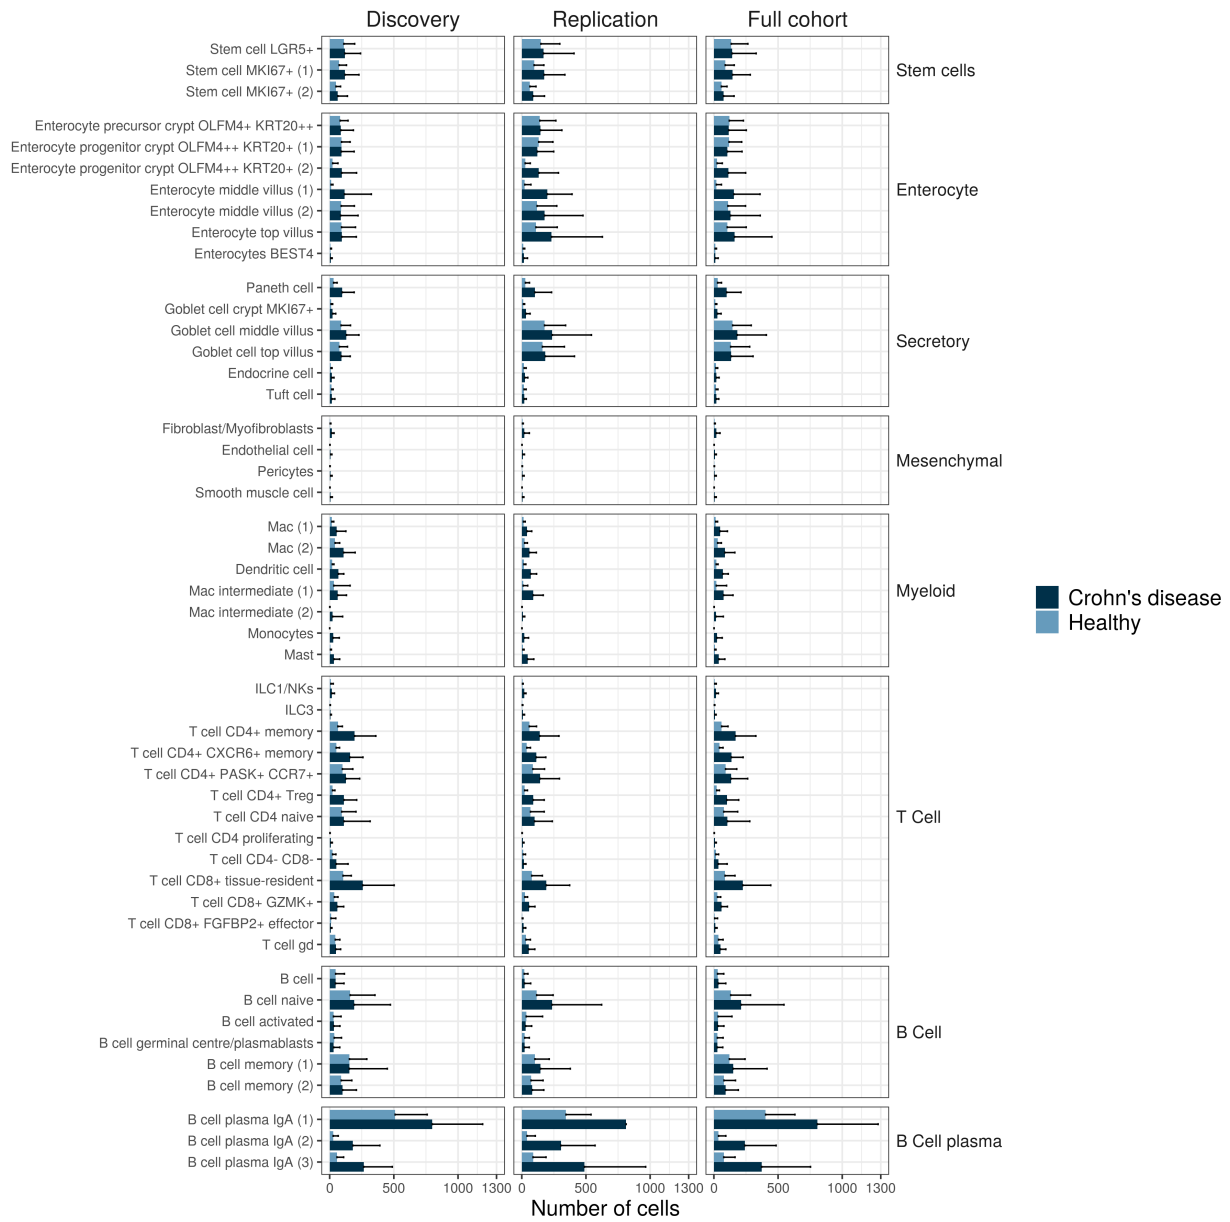

**Figure S3**

**Figure S3. Cellular composition of terminal ileum atlas.**

Mean number of cells in each of 49 cell types across healthy (light blue) and Crohn's disease (dark blue) samples from discovery, replication and full cohorts. Error bars represent standard deviation from the mean number of cells.

**(A) Frequency of differentially expressed genes.**

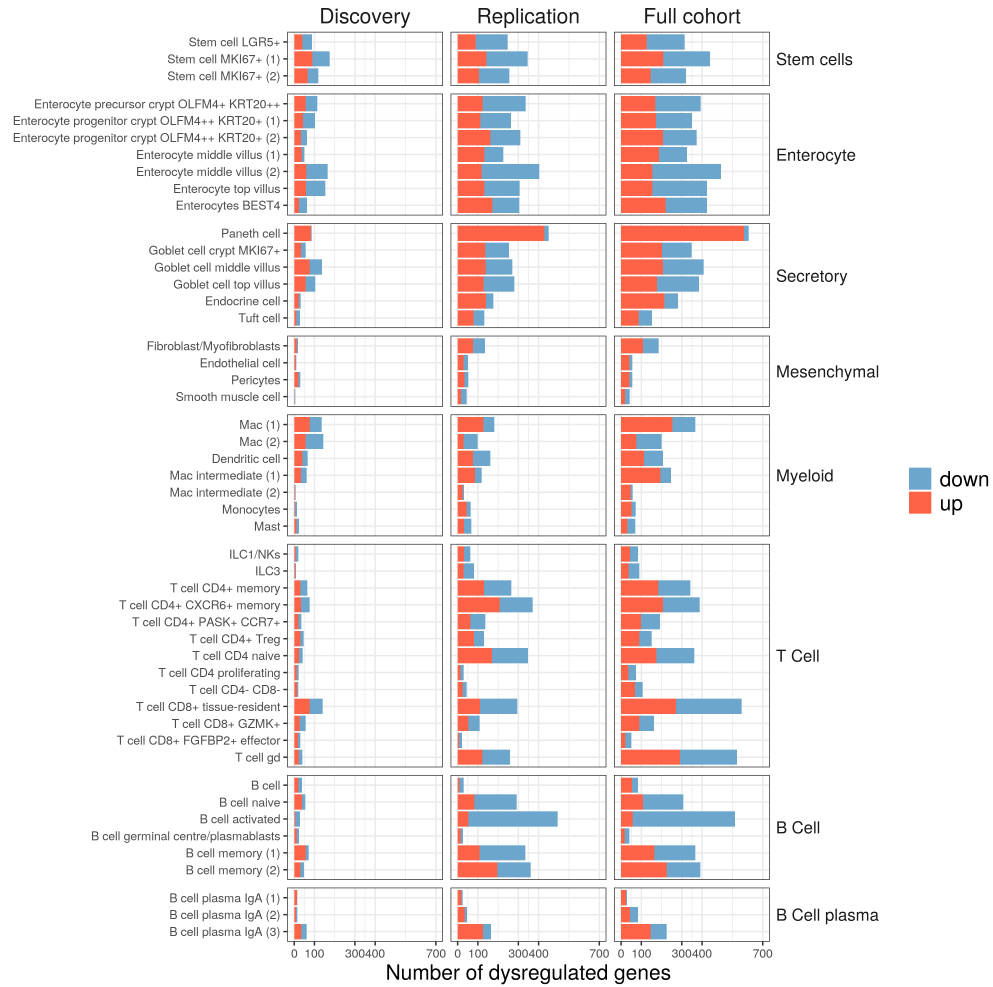

**(B) Number of dysregulated genes is highly correlated with cell abundance.**

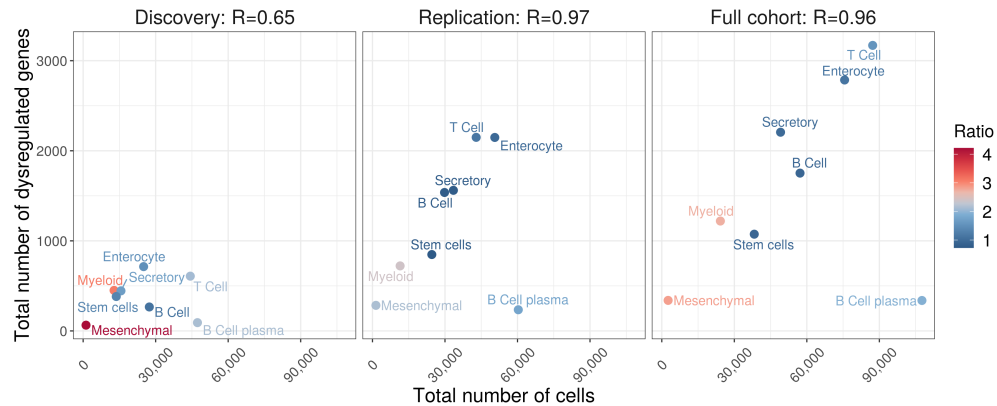

**Figure S4**

**Figure S4. Differentially expressed genes in Crohn's disease (CD) across all 49 cell types.**

(A) Number of significantly ( $FDR < 5\%$ ) up- and down-regulated genes (x axis) found in each of 49 cell types (y axis) across discovery, replication and full cohorts. (B) Shown are the total number of cells in each major cell population (x axis), the total number of significantly dysregulated genes ( $FDR < 5\%$ ) and ratio of cells in CD vs healthy (colour) across discovery, replication and full cohorts. Pearson correlation coefficient (R) was calculated for all major cell populations except outlying B plasma cells.



**Figure S5. Reproducibility of differentially expressed genes across discovery and replication cohorts.**

(A) DGE log<sub>2</sub> fold changes of set of genes significantly up-regulated (FDR < 5%) across epithelial cells in the discovery and replication cohorts. Genes dysregulated in both cohorts in the same cell types (so-called replicable) were denoted by an asterisk. (B) For each of the 49 cell types we fitted linear regression model between DEGs log<sub>2</sub> fold changes in the discovery (x axis) and replication (y axis) datasets. For colour legend see Figure 1B. (C) Pearson correlation (across both cohorts) between all 49 cell types in terms of i) upper triangle - specificity of genes and ii) bottom triangle - DGE log<sub>2</sub> fold changes. Prior to calculating correlation on DGE log<sub>2</sub> fold changes we removed a set of genes with high expression ie. immunoglobulin, mitochondrial and ribosomal.

**(A)** Number of dysregulated pathways that are replicated across both cohorts.

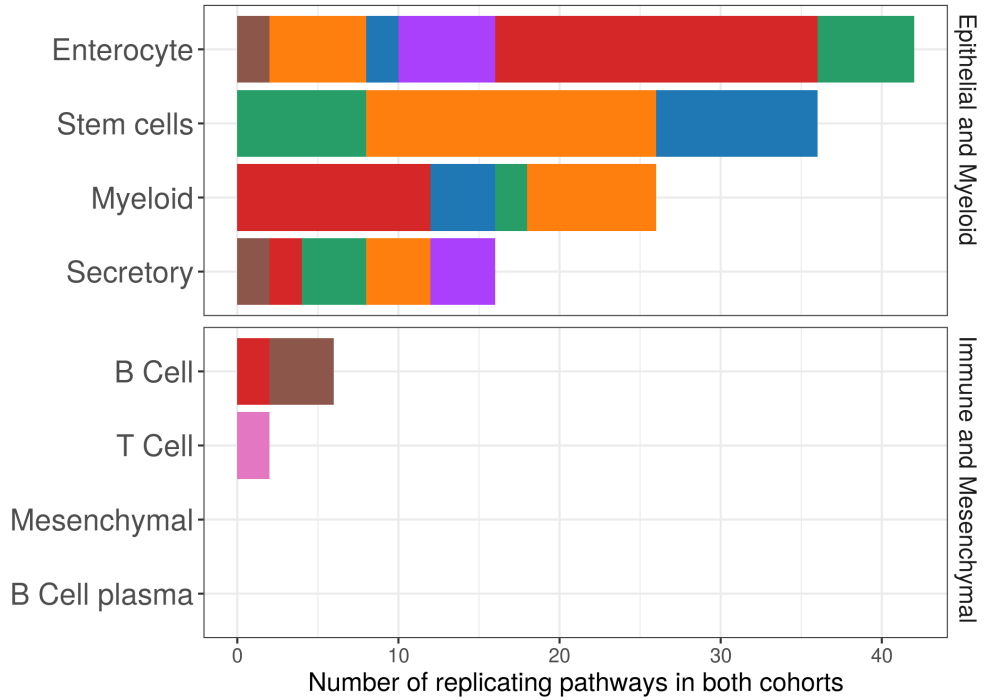

**(B)** Immune-related pathways up-regulated in Crohn's disease.

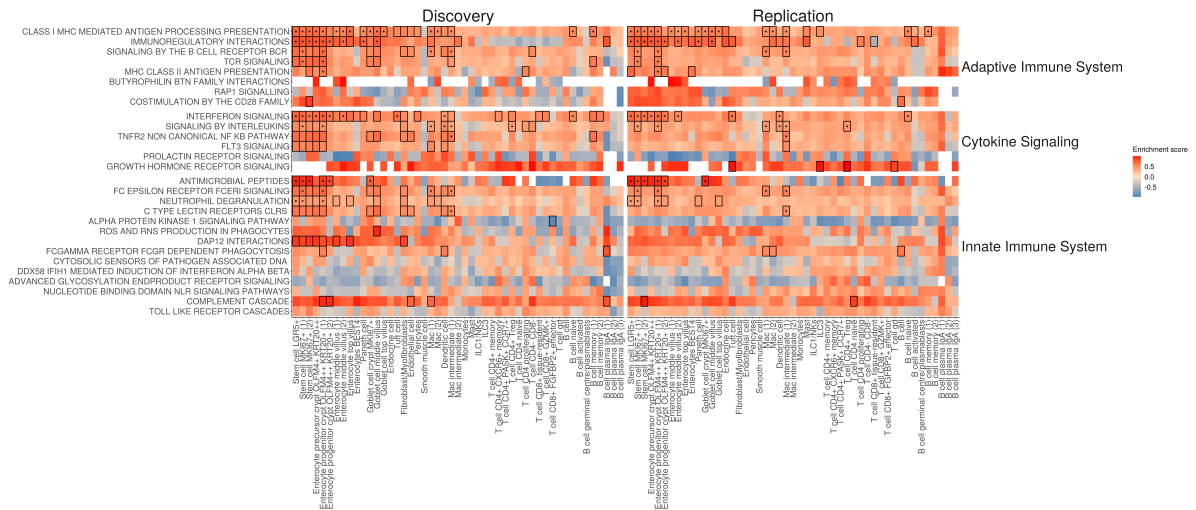

**Figure S6**



**Figure S6. Pathways dysregulated between health and disease.**

(A) Number of replicating GSEA pathways that were significantly dysregulated in both cohort cell types. For colour legend see Figure 1B. (B) Enrichment of all cell types across three pathway categories: "Adaptive immune system", "Cytokine signaling", "Innate immune system" and their respective sub-pathways. Tiles represent significantly dysregulated pathways (FDR < 5%) in CD versus healthy samples with their enrichment score (colour). Dysregulated pathways replicable in both cohorts were denoted with an asterisk. Pathways are ordered from those most abundantly enriched to those least abundantly enriched.

**(A) Expression of MHC class I genes**

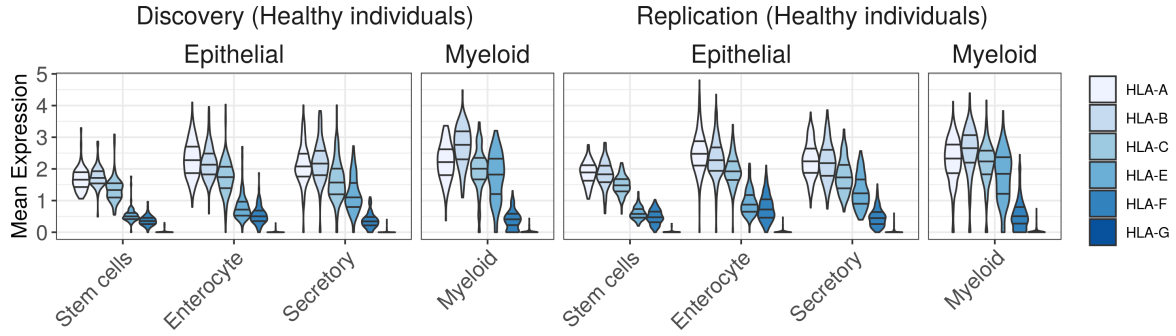

**(B) Dysregulation of *IFNGR1* receptor**

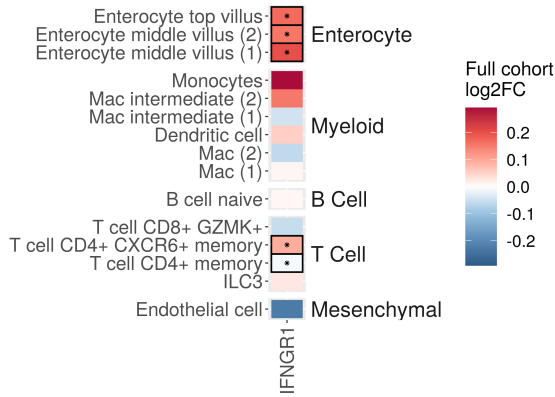

**(C) MHC-II components upregulated in CD epithelial cells**

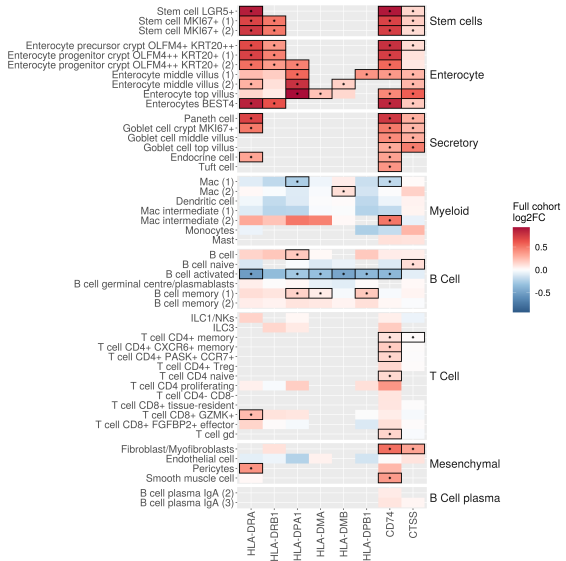

**(D) Expression of CD58/CD2 ligand-receptor pair**

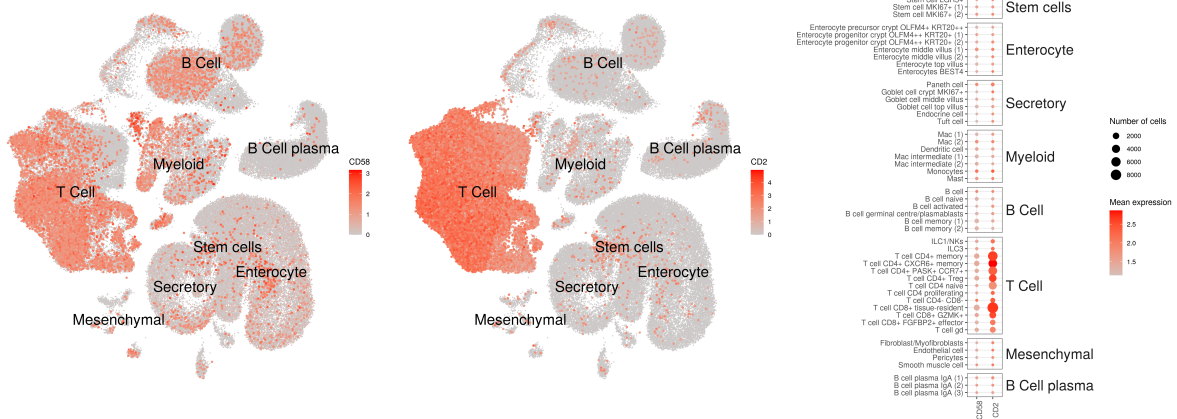

**Figure S7**

**Figure S7. Upregulation of Major Histocompatibility genes and related receptors.**

(A) We observed consistent expression levels of MHC-I genes across epithelial and myeloid cells in healthy individuals of the discovery and replication cohorts. (B) We showed that *IFNGR1* receptor is upregulated in the full cohort across enterocyte middle and top villus cells during CD. Significant DE genes (FDR < 5%) were denoted by an asterisk. (C) Log2 fold change of MHC-II genes across all cell types. Significant DE genes (FDR < 5%) were denoted by an asterisk. (D) Terminal ileum atlas UMAP projections (from discovery dataset only) coloured by the log1p CP10k expression of *CD58* and *CD2* genes. Alongside dotplot representing the number of cells expressing *CD58* and *CD2* with log1p CP10k > 1.

**(A)** Optimisation over number of factors in the discovery cohort

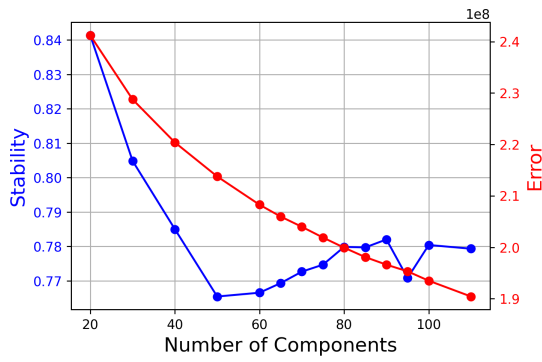

**(B)** Optimisation over number of factors in the replication cohort

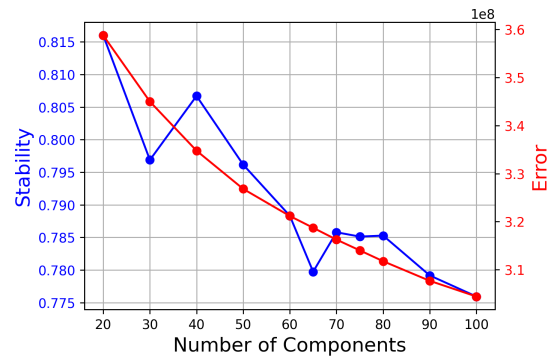

**(C)** Correlation between identified non-negative matrix factorisation (NMF) factors in two cohorts.

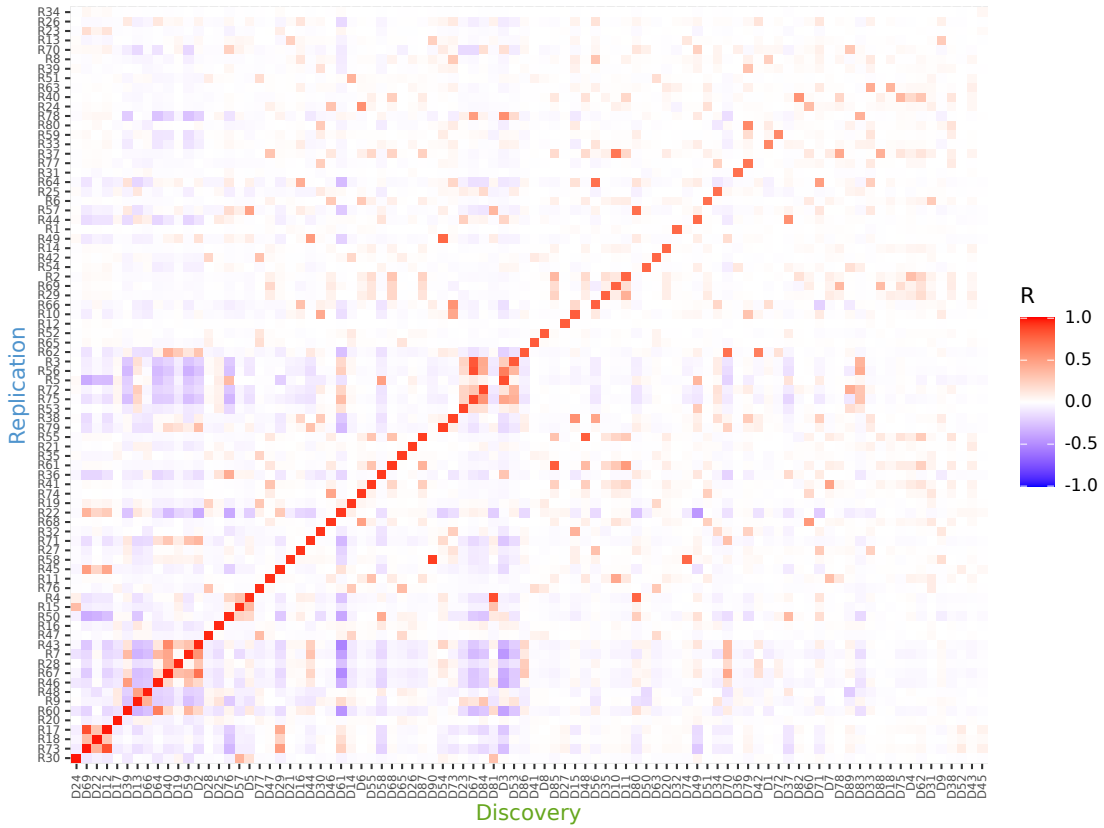

**Figure S8**

**Figure S8. Optimisation of non-negative matrix factorisation (NMF) parameter selection.**

Stability (in blue) and error (in red) across iterations when detecting NMF factors for (A) discovery and (B) replication cohorts showing optima at 90 and 80 factors, respectively. (C) The majority of identified NMF factors were highly correlated (Pearson's  $R > 0.75$ ) between discovery and replication cohorts.

**(A)** Genes with the largest contribution to ambient transcript gene signature.

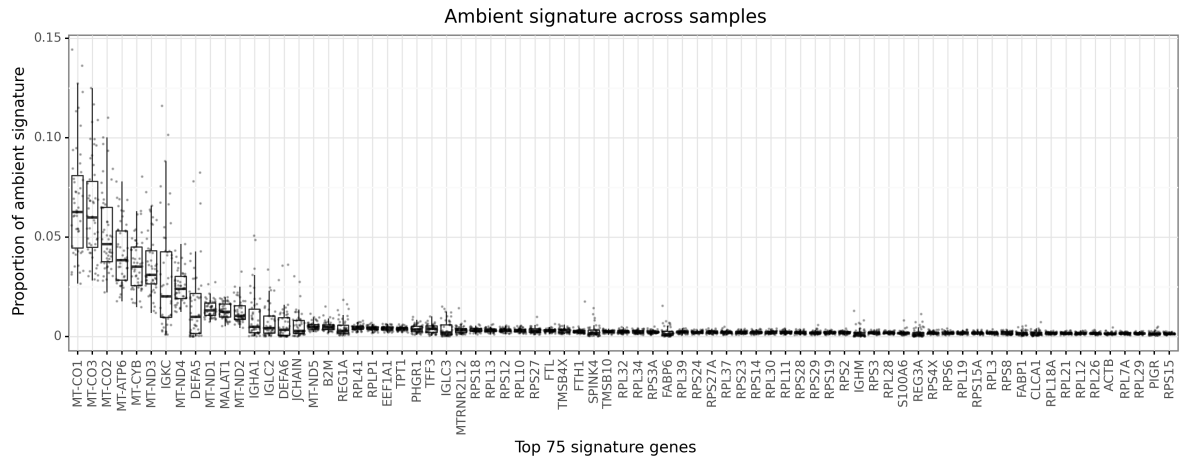

**(B)** Predictability of clusters at various resolutions.

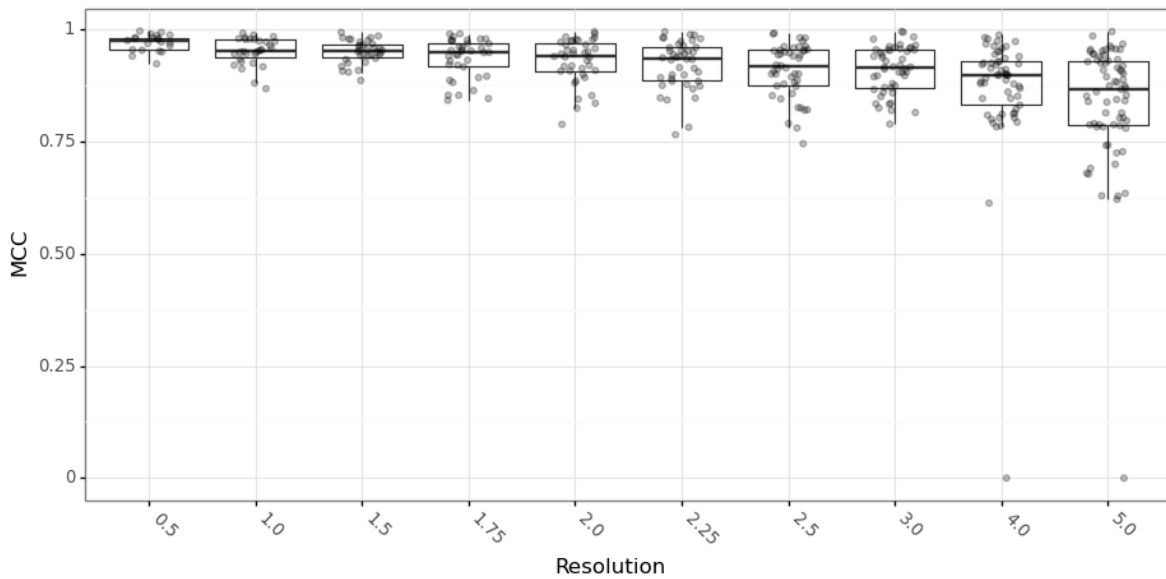

**Figure S9**

**Figure S9. Quality control and cluster optimisation.**

(A) The 75 genes (x axis) identified by CellBender that contributed most to the ambient transcript signature (y axis) across samples in the discovery dataset. (B) Cluster resolution (x axis) and the predictability of clusters (points) using cells withheld from training as measured by Matthews correlation coefficient (MCC; y axis; Methods). We selected a resolution of 3 as the predictability of clusters rapidly deteriorates at resolutions  $> 3$ .
